# Supplementary material
Source: MDPI journal article supplement (https://www.mdpi.com/2226-471X/7/2/155)
Supplement: s1 [file s1]

## Appendix to

Gehrke, Berit (2022): Differences between Russian and Czech in the use of aspect in narrative discourse and factual contexts. *Languages*.

(More examples, but also not all the examples)

All examples discussed and appended in MA thesis:

Gehrke, Berit (2002): *Systemhafte Unterschiede im Aspektgebrauch zwischen dem Russischen und dem Tschechischen*. Unpublished Master Thesis, HU Berlin.

<http://www.beritgehrke.com/uploads/1/0/6/4/106403025/ma-text.pdf>

## ABBREVIATIONS

|      |                                               |
|------|-----------------------------------------------|
| AA   | Aktionsart                                    |
| Adj  | adjective                                     |
| AP   | adverbial participle/gerund/converb (Russian) |
| det  | determinate (motion verb)                     |
| freq | frequentative                                 |
| Fut  | future                                        |
| i    | imperfective verb form, imperfective aspect   |
| ind  | indeterminate (motion verb)                   |
| IPF  | imperfective                                  |
| mod  | modal                                         |
| p    | perfective verb form, perfective aspect       |
| Part | participle                                    |
| perf | perfective aspect with a perfect function     |
| PF   | perfective                                    |
| Präs | present tense                                 |
| Prät | past tense                                    |
| SI   | secondary imperfective                        |

## Sources:

|      |                                                                                                        |
|------|--------------------------------------------------------------------------------------------------------|
| Dov  | Dovlatov, Sergej: Zona. Zapiski nadziratelja. / Lágr.                                                  |
| JR   | Hrabal, Bohumil: Jetel růžák. / Grabal, Bogumil: Rozovjy klever.                                       |
| Kun  | Kundera, Milan: Žert. / Šutka.                                                                         |
| MM   | Bulgakov, Michail: Master i Margarita. / Mistr a Markétka.                                             |
| MP   | Hrabal, Bohumil: Mořská panna. / Grabal, Bogumil: Rusalka.                                             |
| RJ   | Bulgakov, Michail: Rokovyje jajca. / Osudná vejce.                                                     |
| RP   | Hrabal, Bohumil: Rukověť Pábitelského učně. /<br>Grabal, Bogumil: Rukovodstvo Il'ja učeníka Pabitelja. |
| Sext | Hrabal, Bohumil: Sextánka. / Grabal, Bogumil: Šestiklassnica.                                          |

Remarks about annotations in the data:

- bold-faced for verb forms
- underlined for differences in aspect use
- superscripted i, p etc. for imperfective, perfective etc. (see abbreviations above)

## 1 Single, episodic events: chains of events, grounding

Similar findings as in Stunová (1988, 1993), who provides the following statistics:

**Stunová 1988, 513:**

|         | PF  | IPF |
|---------|-----|-----|
| Russian | 135 | 5   |
| Czech   | 75  | 65  |

**Stunová 1993, 115: „Russian pf. vs. Czech ipf.**

|                                              |             |
|----------------------------------------------|-------------|
| Verba movendi                                | 206 (46,3%) |
| Verba dicendi / sentendi / cogitandi         | 99 (20,3%)  |
| Movement vs. state / in medias res           | 58 (12%)    |
| Ingressive vs. middle aspect phase           | 53 (11%)    |
| Other = modal, durative, conative, iterative | 70 (14,4%)  |

### 1.1 Russian IPF in chains of events

Continuing, verbs of saying:

- (1) [...] **řekl<sup>P</sup>** a **pokračovali<sup>I</sup>** [...]  
[...] **otvetil<sup>P</sup>** on i **prodolžal<sup>I</sup>** [...] (Kun 10 / 11; also: Kun 10f. / 12 and elsewhere)
- (2) Tut glaza gostja široko **otkrylis<sup>P</sup>**, i on **prodolžal<sup>I</sup>** **šeptat<sup>I</sup>**, **gliadja<sup>IAP</sup>** na lunu: [...]  
Autor se **zahleděl<sup>P</sup>** na měsíc a **pokračovali<sup>I</sup>** **šeptem**, oči **rozšířené<sup>PPart</sup>**: [...] (MM 133 / 111)
- (3) [...] redaktor **dostal<sup>P</sup>** stranickou důtku, technička **byla napomenuta<sup>P</sup>** a oba **museli<sup>I</sup>** před výborem **slíbit<sup>P</sup>**, že se spolu rozejdou. Bohužel slova jsou jen slova, **řekli<sup>P</sup>** je jen proto, aby nás ukonejšili a **scházeli<sup>I</sup>** se spolu **dál**, ale lež má krátké nohy, **dověděli<sup>P</sup>** jsme se o tom brzy a já jsem pak **byla<sup>I</sup>** pro to nejpřísnější řešení, **navrhla<sup>P</sup>** jsem, aby [...]  
[...] redaktor **polučil<sup>P</sup>** partijní vygovor, montážistka **vynesli<sup>P</sup>** predupreždenie, i oboich **objazali<sup>P</sup>** **dat<sup>P</sup>** slovo komitetu, čo oni rasstanutsja. K sožaleniju, slova – odno, a delo – drugoe, oni **dali<sup>P</sup>** obeščanie, liš' by nas uspokoit', a sami **prodolžali<sup>I</sup>** **vstrečat'sja<sup>I</sup>**, odnako na lži daleko ne uedeš', vskore my **uznali<sup>P</sup>** ob etom, ja **zanjala<sup>P</sup>** oč'en' tverduju poziciju, **predložila<sup>P</sup>** [...] (Kun 23 / 27f.)
- (4) [...] a kočí se za mnou **rozeběhl<sup>P</sup>** a **hrozil<sup>I</sup>** mi, že [...]  
[...] i vozčik **pognalsja<sup>P</sup>** za mnoj i **křičal<sup>I</sup>**, čo [...] (MP 10)
- (5) **Seděl<sup>I</sup>** jsem tedy před třemi tykajícími vysokoškoláky, kteří mi **položili<sup>P</sup>** první otázku: zda prý znám Markétu. **Řekl<sup>P</sup>** jsem, že ji znám. **Ptali<sup>I</sup>** se mne, jestli jsem si s ní **dopisoval<sup>I</sup>**. **Řekl<sup>P</sup>** jsem, že ano. **Ptali<sup>I</sup>** se mne, jestli si nepamatuju, co jsem jí psal. **Řekl<sup>P</sup>** jsem, že si to nepamatuju [...] Nemůžeš si vzpomenout? **ptali<sup>I</sup>** se mne. Ne, **řikal<sup>I</sup>** jsem. A co ti psala Markéta? **Pokrčil<sup>P</sup>** jsem rameny, abych vzbudil dojem, že mi psala o intimních věcech, o nichž tu nemohu hovořit. Nepsala ti něco o školení? **ptali<sup>I</sup>** se. Ano, psala, **řekl<sup>P</sup>** jsem. Co ti o tom psala? Že se jí tam líbí, **odpověděl<sup>P</sup>** jsem. A co dál? Že jsou dobré referáty a dobrý kolektiv, **odpovídal<sup>I</sup>** jsem. Psala ti, že vládne na školení zdravý duch? Ano, **řekl<sup>P</sup>** jsem, snad něco takového psala. Psala ti, že poznává, co je to síla optimismu? **ptali<sup>I</sup>** se **dál**. Ano, **řekl<sup>P</sup>** jsem. A co ty si myslíš o optimismu, **zeptali<sup>P</sup>** se. O optimismu? Co bych si o něm měl myslet? **ptali<sup>I</sup>** jsem se. Považuješ se sám za optimistu? **ptali<sup>I</sup>** se **dál**. Považuju, **řekl<sup>P</sup>** jsem nesměle. Mám rád legraci, jsem docela veselý člověk, **snažil<sup>I</sup>** jsem se zlehčit tón výslechu. Veselý může být i nihilista, **řekl<sup>P</sup>** jeden z nich, může se třeba smát lidem, kteří trpí. Veselý může být i cynik, **pokračovali<sup>I</sup>**. Myslíš si, že se dá vybudovat socialismus bez

optimismu? **zeptal** se jiný. Ne, **řekl** jsem. Tak ty tedy nejsi pro to, aby se u nás vybudoval socialismus, **řekl** třetí. Jak to? **bránil** jsem se. Protože optimismu je pro tebe opium lidstva, **útočil**. Jak to, opium lidstva? **bránil** jsem se stále. Nevykručuj se, napsals to. [...]

Itak, ja **sidel** před tremja „tykajuščimi“ studentami, kotorye **zadali** mne pervyj vopros: znaju li ja Marketu. Ja **skazal** – znaju. Oni **sprosil**, **perepisyvalsja** li ja s nej. Ja **otvetil**, perepisyvalsja. Oni **sprosil**, ne pomnju li ja, čto pisal ej. Ja **skazal**, ne pomnju [...] Ty ne možeš vspomnit’? – **sprosil** menja. Net, **otvetil** ja. A čto tebe pisala Marketa? Ja **požal** plečami, daby sozdat’ vpečatlenie, čto pisala ona ob intimnych veščach, o kotorych govorit’ ne mogu. Ona pisala tebe čto-nibud’ o politzanajtijach? – **sprosil**. Da, pisala, **skazal** ja. Čto že ona tebe pisala? Čto ej tam nnavitsja, **otvetil** ja. A čto ešče? Čto tam chorošie doklady i chorošij kollektiv, **dobavil** ja. Ona pisala tebe, čto na politzanajtijach carit zdorovyj duch? Da, **skazal** ja, požaluj pisala čto-to vrobe togo. A možet, pisala tebe, čto postepenno uznaet, čto takoe sila optimizma? – **napirali** oni. Pisala, **skazal** ja. Nu i čto ty dumaeš ob optimizme? A čto ja dolžen o nem dumat’? – v svoju očered’ **zadal** vopros ja. Sčitaesh’ ty sam sebja optimistom? – **prodolžali** oni. Sčitaju, **otvetil** ja robko. Ja ljublju pošutit’, ja vpolne veselyj čelovek, **stremilsja** ja smjagčit’ ton doprosa. Veselyj možet byt’ i nigilistom, **skazal** odin iz nich, on sposoben, naprimer, potešat’sja nad ljud’mi, kotorye stradajut. Veselyj byvaet i cinikom, **zaključil** on. Polagaeš, čto možno postroit’ socializm bez optimizma? – **sprosil** menja drugoj. Net, **otvetil** ja. Tak ty, stalo byt’, protiv togo, čtoby u nas byl postroen socializm, skazal tretij. Kak tak? – **zaščiščalsja** ja. Potomu čto dlja tebja optimizm – opium dlja naroda, **nastupali** oni. Kak tak, opium dlja naroda? – vse ešče **otbivalsja** ja. Ne vykručivajsja, ty tak i napisal [...] (Kun 38 / 44f.)

Interrupting the chain:

- (6) Professor **dobraljsja** do komnaty Pankrata i **dolgo i bezuspešno stučali** v nee. **Nakonec** za dver’ju **poslyšalos’** určen’e [...]

Profesor **dotápal** až k Pankratovu pokojíku a **dlouho bezúspěšně klepal** na dveře. **Konečně** se za dveřmi **ozval** cosi [...] (RJ 391 / 13)

- (7) On **podnjál** s zemli mikroskopičeskiju vešč’ i **dolgo teri** ee rukavom.

**Zvedl** ze země mikroskopickou věčičku a **dlouho ji leštil** rukávem. (Dov 37 / 15)

- (8) A já jsem **zdrudnul**, **rozhlížel** se a pak jsem **obrátil** pokladničku a **štěrchal** jsem **tak dlouho**, až mi **vypadla** plná hrst mincí. **Dal** jsem je do kapsy [...]

I ja **zalilsja** kraskoj, **ogľianulsja**, a potom **perevernul** cerkovnuju kružku i **trjas** ee **do tech por**, poka u menja na ladoni ne **vyrosla** kučka monet. Ja **sunul** ich v karman [...] (MP 10f.)

- (9) Proti mně **kráčel** tlustý strážník, sám velitel policie pan Fidrmuc, rovnou **šelidet** ke mně, **zastavil** se [...]. Ted’ je **našel**, spokojeně ale **vytáhl** cigártašku, **dlouho vybíral** viržinko, pak je **prohmatal**, **vytáhl** slámku a s chutí si **zapálil** a **prošel** s tím metrákovým břichem kolem mne.

Ko mne **priblížalsja** tolstýj policejskij, sam načal’nik policii pan Fidrmuc, on **šagal** prjamo na menja, **a potom ostanovilsja** [...] s dovol’ným vidom **vytaščiv** portsigar, on **dolgo vybíral** virdžinskiju sigaru, **potom razmjál** ee, **dostal** spički, s naslaždeniem **zakuril** a **prošel** mimo menja, **nesja** svoj ogromnyj život. (MP 11f.)

## 1.2 Ingressivity

No neutral ingressivity in Czech, but there is ‚begin‘, and also the more marked evolutive Aktionsart with *roz-*

- (10) [...] pak **se stal**<sup>P</sup> zázrak, **postupně** se k nám **přidávaly**<sup>I</sup> další a další hlasy, lidé **začali**<sup>P</sup> **chápat**<sup>I</sup> a píseň se **pomalů klubala**<sup>I</sup> z velkého rámusu náměstí jak motýl z obrovské hlučící kukly.

[...] no vdrug **proizošlo**<sup>P</sup> čudo, v naše penie **stali**<sup>P</sup> **vlivat'sja**<sup>I</sup> vse novye i novye golosa, ljudi **uslyšali**<sup>P</sup> nas, i pesnja **ispodvol' načala**<sup>P</sup> **vysvoboždat'sja**<sup>I</sup> iz dikogo guda ploščadi, slovno babočka iz ogromnogo gudjaščego kokona. (Kun 20 / 23)

- (11) [...], - professor **naklonilsja**<sup>P</sup> i **zadumalsja**<sup>P</sup>, **gljadja**<sup>IAP</sup> na razno obutyje nogi, - [...].

[...] **Sklonil**<sup>P</sup> se a **chvíli uvažoval**<sup>I</sup>, **pohled upřený**<sup>PPartadj</sup> na svoje nohy: [...] (RJ 392 / 14)

- (12) Ja **čuvstvoval**<sup>I</sup> sebja lučše, neželi možno bylo predpologat'. U menja **načalos'**<sup>P</sup> razdvoenie ličnosti. Žizn' **prevratilas'**<sup>P</sup> v sjužet.

Ja chorošo pomnju, kak éto **slučilos'**<sup>P</sup>. Moe soznanie **vyšlo**<sup>P</sup> iz privyčnoj oboločki. Ja **načal**<sup>P</sup> **dumat'**<sup>I</sup> o sebe v tret'em lice.

Já sám se **cítil**<sup>I</sup> líp, než by se možná dalo přepokládat. **Pozoroval**<sup>I</sup> jsem u sebe **počínající**<sup>IPart</sup> rozdvojení osobnosti. Život se mi **proměnil**<sup>P</sup> v námět.

Dobře si vzpomínám, jak se to **stalo**<sup>P</sup>. Mé vědomí **opustilo**<sup>P</sup> navyklost skořápku. **Začal**<sup>P</sup> jsem o sobě **přemítat**<sup>I</sup> ve třetí osobě. (Dov 42 / 21)

- (13) Na sosednej kojke, **ukryvšis'**<sup>PAP</sup>, **ležal**<sup>I</sup> Fidel'. Vdrug on **sel**<sup>P</sup> na posteli i **zagovoril**<sup>PAA</sup>: [...]

Na vedlejší lůžku se až po bradu **zakryl**<sup>P</sup> Fidél. Najednou se **posadil**<sup>P</sup> a **začal**<sup>P</sup> **mluvit'**<sup>I</sup>: [...] (Dov 47 / 26)

Czech *za-* is a different Aktionsart (Petruxina 2000: *kvantovo-pragmaticeskaja modifikacija*; a type of semelfactive Aktionsart)

- (14) Opisanie užasnoj smerti Berliozu slušajuščij **sopровоždal**<sup>I</sup> zagadočnym zamečaniem, pričem glaza ego **vspychnulli**<sup>PAA</sup> zloby: [...] Kot, **plativšij**<sup>PPart</sup> konduktorše, črezvyčajno **razveselil**<sup>P</sup> gostja, i on **davilsja**<sup>I</sup> ot tichogo smeča, **gljadja**<sup>IAP</sup>, kak vzvolnovannyj uspechom svoego povestvovanija Ivan ticho **prygaj**<sup>IPrat</sup> na kortočkach, **izobražaja**<sup>IAP</sup> kota s grivennikom vogle uchov.

Když se Ivan **zmínil**<sup>P</sup> o Berliozově tragické smrti, neznámý **utrousil**<sup>P</sup> záhadně a přitom mu zlostně **zajiskřilo**<sup>PAA</sup> v očích: [...] **Platící**<sup>IPart</sup> kocour ho mimořádně **rozveselil**<sup>P</sup>, až se **zakuckal**<sup>PAA</sup> tichým smíchem, **pozoroval**<sup>I</sup> básníka, jak povzbuzen úspěchem svého vyprávění tiše **hopká**<sup>IPras</sup> v podřepu po pokoji a **předvádí**<sup>IPras</sup> kocoura s desetníkem ukrytým ve vousech. (MM 128f. / 107f.)

- (15) Alichanov **šel**<sup>Iidet</sup> na svet v poluzanesennom okne.

Zatem **postučal**<sup>PAA</sup>, i dver' **otvorilas'**<sup>P</sup>. Iz uzkoj, nerazličimoj ot p'janstva komnaty **vyrvallis'**<sup>P</sup> zvuki staromodnogo tango. Alichanov, **ščurjas'**<sup>IAP</sup> ot sveta, **vošel**<sup>P</sup>.

Alichanov se **orientoval**<sup>(I)/P</sup> podle zpola zataženého svítícího okna.

**Zaklepal**<sup>PAA</sup>, a dveře se **otevřely**<sup>P</sup>. Z úzkého pokoje přeplněného opilostí se **vyhouply**<sup>P</sup> zvuky staromódního tanga. Alichanov **přimhouřil**<sup>P</sup> oči před ostrým světlem a **vstoupil**<sup>P</sup> dovnitř. (Dov 51 / 31)

Russian ingressive *zakričat'* vs. Czech semelfactive *zakřičet*:

- (16) [...] a **najednou** Zavázal hlavou **udeřil**<sup>P</sup> do desky lavice, nosem **udeřil**<sup>P</sup> o dřevo a **tekla**<sup>I</sup> mu krev a **zakřičel**<sup>PAA</sup>, všichni žáci se **polekali**<sup>P</sup>, ale pan děkan dál **krácel**<sup>I</sup> tiše [...]  
 [...] i vdrug Zavázal stuknulsja<sup>P</sup> golovoj o partu, iz nosa u nego **potekla**<sup>P</sup> krov', i on **zakřičel**<sup>PAA</sup>; vse **ispugalis**<sup>P</sup>, no nastojatel' **stupal**<sup>I</sup> sebe neslyšno dal'se [...] (JR 107)

Evolutionary Aktionsart (Russian *raz-* / *ras-* *sja*, Czech *roz-* *se*): correspondence in Czech vs. Russian ingressive *za-*

- (17) [...] a když jsem **vytušila**<sup>P</sup>, že mi rozumí, **rozezpívala**<sup>PAA</sup> jsem se hlasitě, **nestyděla**<sup>I</sup> jsem se [...]  
 [...] a kogda ja **počuvstvovala**<sup>P</sup>, čto on ponimaet menja, ja **zapela**<sup>PAA</sup> gromče, mne sovsem ne **bylo**<sup>I</sup> stydno [...] (Kun 27 / 33)
- (18) V chrámu nikdo **nebyl**<sup>I</sup>, **bylo**<sup>I</sup> tady příjemně a chládek, chvíli jsem se **rozhlížel**<sup>I</sup> a z celého vnitřku kostela jsem **viděl**<sup>I</sup> jenom dvě pokladničky u klekátek. Zase se mi **roztlouklo**<sup>PAA</sup> srdce. Abych se **ztišil**<sup>P</sup>, **klekl**<sup>P</sup> jsem si na klekátko pod sochu svatého Antoníčka a **dělal**<sup>I</sup> jsem, že se **modlím**<sup>I</sup>.  
 V chrame nikogo ne **okazalsja**<sup>P</sup>, tam **bylo**<sup>I</sup> chorošo, prochladno, ja **načal**<sup>P</sup> **ogljadyvat'sja**<sup>I</sup> po storonam, no ne **uvidel**<sup>P</sup> ničeho, krome dvouh kružek dlja požertvovanih vozle molitvennyh skameček. U menja opjat' **zakolotilos**<sup>P</sup> serdce. Čtoby **uspokoit'sja**<sup>P</sup>, ja **opustilsja**<sup>P</sup> na koleni pod statuej svjatogo Antonija i **sdelal**<sup>P</sup> vid, čto **moljus**<sup>I</sup>. (MP 10f.)

### 1.3 Verba sentiendi and Verba cogitandi

- (19) [...] ale když se potom **dal**<sup>P</sup> se mnou **do řeči**, **cítila**<sup>I</sup> jsem **najednou**, jak se zaplétám, pláčám, jak mluvím hloupě, a on **když viděl**<sup>I</sup>, že jsem v rozpacích, **obrátil**<sup>P</sup> hned řeč na obyčejné věci [...]  
 [...] no **stoilo**<sup>I</sup> emu **zagovorit**<sup>P</sup> so mnoj kak ja **vdrug počuvstvovala**<sup>P</sup>, čto sbivajus', boltaju vsjakuju čuš', govorju glupo, a on, **zametiv**<sup>P</sup> moju rasterjannost', **svernul**<sup>P</sup> razgovor na banal'nye temy [...] (Kun 25 / 30)
- (20) Pak holíčka **poodstoupila**<sup>P</sup> a já jsem **slyšel**<sup>I</sup> jen pohyby břitvy o kožený brusný pás a **utkvěl**<sup>P</sup> jsem v jakémsi slastném nepohnutí plném příjemné lhostejnosti. Za chvíli jsem **ucítil**<sup>P</sup> na tváři prsty, vlhké a klouzavé, jak mi **roztírají**<sup>P</sup> po kůži mýdlový krém, a **uvědomoval**<sup>I</sup> jsem si tu divnou a směšnou věc, že mně jakási cizí žena, po které mi nic není a které není nic po mně, něžně **hladí**<sup>I</sup>. Holíčka pak **začala**<sup>P</sup> mýdlo **roztírat**<sup>P</sup> štětkou a mně se **zdálo**<sup>I</sup>, že snad ani **nesedím**<sup>I</sup>, ale jen tak **tkvím**<sup>I</sup> v bílém flekatém prostoru, do něhož jsem **upíral**<sup>I</sup> zrak.  
 Potom parikmacherša **otošla**<sup>P</sup> čut', i ja, **prislušivajas**<sup>I</sup> liš' k šorkan'ju britvy o kožanyj točil'nyj remen', **zastyl**<sup>P</sup> v kakoj-to sladostnoj nepodvižnosti, ispolnennoj blažennogo bezučastija. Minutoj pozže ja **oščutil**<sup>P</sup> na lice pal'cy, vlažnye i skol'zjaščie, legko **rastiravšie**<sup>I</sup> po moej kože myl'nyj krem, i **vdrug osoznal**<sup>P</sup> nečto strannoe i smešnoe: kakaja-to čužaja ženščina, kotoraja mne stol' že bezralična, kak i ja ej, nežno **gladit**<sup>I</sup> menja. Zatem parikmacherša **stala**<sup>P</sup> **vzbíbat**<sup>P</sup> myl'nuju penu kistočkoj, i mne **pokazalos**<sup>P</sup>, budto ja vovse ne **sižu**<sup>I</sup> v kresle, a **vitaju**<sup>I</sup> v belom, pokrytom pjatnami prostranstve, **upirajas**<sup>IAP</sup> v nego vzgljadom. (Kun 13 / 16)
- (21) [...] že jsem u něho **byla**<sup>I</sup> celou hodinu a o jeho ústavu jsem **věděla**<sup>I</sup> tolik co předtím [...]

[...] čto ja **protorčala**<sup>PAA</sup> u nego **bityj čas** i **ušla**<sup>P</sup>, tak i ne **uznav**<sup>PAP</sup> dlja sebja ničego novogo [...] (Kun 25 / 30f.)

- (22) [...] **vyšel**<sup>P</sup> jsem z budovy Svazu studentstva a **cítíl**<sup>I</sup> jsem, že [...]  
[...] ja **vyšel**<sup>P</sup> iz zdaniya Studenčeskogo sojuza **s čuvstvom**, čto [...] (Kun 37 / 43)
- (23) Zatem Alichanov snova **uvidel**<sup>P</sup> kvadrat volejbol'noj ploščadki, **belejuščij**<sup>IAP</sup> na fone travy.  
Pak Alichanov znovu **zahlédl**<sup>P</sup> čtverec volejbalového hřiště, **bělající**<sup>IAP</sup> se na pozadí trávy. (Dov 53 / 33f.)

#### 1.4 Motion verbs

Czech verb *pojít* is not a motion verb but means 'to die a miserable death':

- (24) [...] **izdochli**<sup>P</sup> pervonačal'no vosem' velikolepnych ékzemplarov kvakšej [...]  
[...] nejprvé **pošlo**<sup>P</sup> osm velkolepých exemplářů rosníček [...] (RJ 386 / 6)

Po- for imperatives of Czech determinate motion verbs:

- (25) Víte co, **pojd'te**? na chvíli ke mně, než budu muset odjet.  
Znaete čto, **zajdemte**<sup>P</sup>-ka nenadolgo ko mne do moego ot"ezda. (Kun 10 / 11f.)

Po- in Czech for synthetic present tense forms of determinate motion verbs (with future meaning):

- (26) [...] i když jsem zpočátku nevěděl, kam vlastně **půjdu**?  
[...] chotja točno ešče ne znal, kuda, sobstvenno, **deržu' put'**. (Kun 8 / 9)
- (27) Dnes **půjdu**? brzo **spát**, nevím sice, jestli **usnu**<sup>P</sup>, ale **půjdu**? brzo **spát** [...]  
**Ljagu**<sup>P</sup> segodnja rano, chot' i ne znaju, **usnu**<sup>P</sup> li, no **ljagu**<sup>P</sup> poran'se [...] (Kun 19 / 20)

Regular correspondence Russian *pošel* – Czech *šel*, and similar:

- (28) Ja ne **znal**<sup>I</sup>, čto imenno togda **dostig**<sup>P</sup> veršiny blagopolučija. Dal'se vse **pošlo**<sup>P</sup> chuže.  
**Netušil**<sup>I</sup> jsem, že právě tato doba **byla**<sup>I</sup> vrcholem životního štěstí. Pak už **šlo**<sup>idet</sup> všechno mnohem hůř. (Dov 35 / 14)
- (29) Ted' jsem už jen **trnul**<sup>P</sup>, jestli se mi znovu neoženil, protože to by ztěžovalo splnění mé žádosti, a **spěchal**<sup>I</sup> jsem rychle k nemoci.  
Sejčas **opasalsja**<sup>P</sup> liš' odnogo: ne ženilsja li on vo vtoroj raz, ibo éto usložnilo by ispolnenie moej pros'by. Itak, ja **pospešil**<sup>P</sup> k bol'nice. (Kun 9 / 10)
- (30) **Zavřel**<sup>P</sup> jsem okno, **zatáhl**<sup>P</sup> záclony a **šel**<sup>I</sup> jsem k umývadlu, jež **mělo**<sup>I</sup> dva kohoutky, jeden označený červeně, druhý modře; **zkusil**<sup>P</sup> jsem je a z obou **tekla**<sup>I</sup> studená voda. **Podíval**<sup>P</sup> jsem se na stůl [...]  
Ja **zakryl**<sup>P</sup> okno, **zadernul**<sup>P</sup> štory i **podošel**<sup>P</sup> k umyval'niku **s dvumja kranami** – krasnym i sinym; **otvernul**<sup>P</sup> ich na probu – iz oboich **tekla**<sup>I</sup> cholodnaja voda. **Ogljadel**<sup>P</sup> stol [...] (Kun 7f. / 8)

- (31) **Vysvětlil** jsem mu, že jsem **přijel** před necelou hodinou kvůli nějaké bezvýznamné záležitosti, která mne tu zdrží asi dva dny, a on ihned **projevil** radostný údiv, že má první cesta **vedla** za ním.

Ja **objasnil**, čo **priechal** okolo časa nazad po odnomu neznateľnomu del'cu, ktoroe zaderžit menja zdes' dnja na dva, i on tut že **vyrazil** radostnoe izumlenie, čo moja pervaja dorožka v gorode **privelal** k nemu. (Kun 9 / 10f.)

- (32) Alichanov vodku pit' ne **stal**. On **pošel** v soldatskij kubrik, gde tesnilis' dvuch"jarusnye nary. Potom **staščil** valenki i **zabral** sja naverch.

Alichanov si vodku **nedal**. **Zašel** do vojácké ložnice, kde se tísnily železné palandy. **Zul** si válenky a **vylezl** nahoru. (Dov 47 / 26)

Regular correspondene Czech -stoupit Russian -jti for movement on foot (especially in Kundera, some more cases have already been given above):

- (33) [...] do krámu **vstoupil** nový zákazník, **posadil** se za mémi zády na židličku a **čekal**, až přijde na řadu; [...]

[...] v cirjul'nju **vošel** novyj klient i **sel** za moej spinoj na stul **v ožidanii** svoej očeredi; [...] (Kun 14 / 17f.)

- (34) Ja bystro **perešel** na ee storonu i, **podchodja** k nej, **otvetil**:  
- Net.

Kvapně jsem **přešel** na druhou stranu a **přistoupil** k ní.  
,Ne.' (MM 133 / 111)

- (35) On **pomolčal**, potom **podošel** k vyključatelju, **podnjal** štory, **potušil** vse ogni i **zagljanul** v mikroskop.

**Odmičel** se, potom **přistoupil** k vypínači, **vytáhl** roletu, **zhasl** všechna světla a znovu **nahléd**l do mikroskopu. (RJ 391 / 12)

- (36) **Bylo** polnoe beloe utro s zolotoj polosoj, **pererezavše** kremovoe kryl'co instituta, kogda professor **pokinul** mikroskop i **podošel** na onemevšich nogach k oknu.

**Nastoupilo** bílé jitro se zlatým pásem, **který přetínal** krémové zápraží ústavu, když profesor **opustil** mikroskop a **zamířil** zdřevěnělýma nohama k oknu. (RJ 391 / 12)

Different lexical items (not direct translation):

- (37) Po Tverskoj **šli** tysjači ljudej, no ja vam ručajus', čo **uvidela** ona menja odnogo i **pogljadela** ne to čo trevožno, a daže kak budto boleznenno.

**Proudily** tam davy, ale ručím vám za to, že ona **viděla** jenom mě. **Vrhla** na mě ani ne tak zneklidňující, jako spíš bolestný pohled. (MM 133 / 111)

- (38) Vertolet **šel** na posadku.

Vrtulník totiž **začal přistávat**. (Dov 39f. / 18)

## 1.5 Aktionsart prefixes

### 1.5.1 The delimitative Aktionsart

Only once in the Czech data:

- (39) **Postojav**<sup>PAP</sup> **nemnogo**, ja **vyšel**<sup>P</sup> za kalitku v pereulok.

Ještě **chvilku** jsem **postál**<sup>PAA</sup> **a pak** jsem **zamířil**<sup>P</sup> k brance a **vpadl**<sup>P</sup> do uličky. (MM 143f. / 119)

Regular absence in Czech translations of Russian *po*-:

- (40) On **pomolčal**<sup>PAA</sup> nektoroe vremja v smjatenii, **vsmatřivajas'**<sup>IAP</sup> v lunu, plyvuščuju za rešetkoj, i **zagovoril**<sup>PAA</sup>: [...]

Chvilí zaraženě **mlčel**<sup>I</sup>, **sledoval**<sup>I</sup> plující měsíc za mříží, a **pak** se **zeptal**<sup>P</sup>: [...] (MM 130 / 109)

- (41) Alichanov **zakuril**<sup>P</sup> cigaretu, **poderžal**<sup>PAA</sup> ee **v otvedennoj ruke**. Zatem krupnym počerkom **vyvel**<sup>P</sup> na liste iz tetradi: [...]

Alichanov si **zapálil**<sup>P</sup> a **ruku s cigaretou** zamyšleně **odtáhl**<sup>P</sup> od úst. Pak velkým písmem na list vytržený ze sešitu **napsal**<sup>P</sup>: [...] (Dov 54 / 34)

Non-temporal interpretation in Czech (applied to already PF verbs):

- (42) Pak holička **poodstoupila**<sup>PAA?</sup> [...]

Potom parikmacherša **otošla**<sup>P</sup> **čut'** [...] (Kun 13 / 16) (≈ 20)

- (43) [...] a **pootočila**<sup>PAA?</sup> křeslo [...]

[...] i **mjaško povernula**<sup>P</sup> křeslo [...] (Kun 14 / 17)

- (44) Teper' ne moglo byt' reči o tom, čtoby Persikov **dvinul**<sup>P</sup> vint [...]

Ted' nemohlo být ani řeči o tom, že by **pootočil**<sup>PAA?</sup> šroubkem [...] (RJ 390 / 12)

Secondary imperfectives for *po*-verbs in Czech (not Aktionsart then):

- (45) On **dremal**<sup>I</sup>, **položiv**<sup>PAP</sup> golovu na kumačovuju skatert' [...]

**Podřimoval**<sup>I(AA)</sup> **s hlavou položenou**<sup>PPart</sup> na plátěný ubrus [...] (Dov 48 / 28)

(*podřimoval* => *dřímat* - schlummern)

- (46) Mne **nravilos'** kino i bezdel'e.

Nejraději jsem **chodil**<sup>I</sup> do kina a **poflakoval**<sup>I(AA)</sup> se. (Dov 35 / 13)

(*poflakoval* => *flakat* - bummeln)

In Russian, this works only with multiplicative verbs:

- (47) **Inogda** ona **šalila**<sup>I</sup> i, zaderžavšis' u vtorogo okonca, **postukivala**<sup>I</sup> noskom v steklo.

**Někdý** se uličnický **zastavila**<sup>P</sup> u sousedního okna a **poklepávala**<sup>I</sup> špičkou na sklo. (MM 135 / 112f.)

- (48) Sudorogi to i delo **prochodili**<sup>I</sup> po ego licu [...]

[...] obličej mu nervózně **poškubával**<sup>I(AA)</sup> [...] (MM 119)

(*poškubával* => *škubat* - zucken)



### 1.5.2 The perdurative Aktionsart

Just once in Czech:

- (49) V to vremja, kak Persikov, **chudeja**<sup>iAP</sup> i **istoščajas**<sup>iAP</sup>, **prosiživali**<sup>(AA)</sup> dni i polovinu **nočej** za mikroskopom, Ivanov [...]

Mezitímco Persikov, **vyhublý**<sup>pPart</sup> a **scvrklý**<sup>pPart</sup>, **proseděl**<sup>pAA</sup> celé dny a polovinu nocí u mikroskopu, Ivanov [...] (RJ 395 / 18)

One more case in Russian (out of three in total):

- (50) Blagodarja tomu, čto assistent **otozval**<sup>p</sup> professora, aměby **proležali**<sup>pAA</sup> poltora **časa** pod dejstviem éтого luča i **polučilos**<sup>p</sup> vot čto: [...]

Díky tomu, že asistent profesora **odvolal**<sup>p</sup>, měňavky **byly**<sup>(l)</sup> půldruhé hodiny **vystaveny**<sup>pPart</sup> účinkům toho paprsku a výsledek **byl**<sup>i</sup> následující: [...] (RJ 393 / 16)

## 1.6 Perfect vs. State reading

Russian PFs with a perfect reading vs. Czech states:

- (51) [...] a tak **byl**<sup>i</sup> **rád**, že [...]

[...] i, konečno, togda on **obradovalsja**<sup>p</sup>, čto [...] (Kun 23 / 27)

- (52) A když **bylo**<sup>i</sup> největší ticho a hlas děkanův se **vznášel**<sup>i</sup> nad vodami, najednou mne **zabolela**<sup>p</sup> strašlivě dohola ostříhaná hlava [...]

Kogda že **nastala**<sup>p</sup> glubokaja tišina i golos nastojatelja **vosparil**<sup>p</sup> nad vodami, u menja vdrug strašno **zabolela**<sup>p</sup> nagolo ostrižennaja golova [...] (JR 107)

- (53) No russkie **predprinjali**<sup>p</sup> oblavu. Les **oglasilsja**<sup>p</sup> krikom. On **stal**<sup>p</sup> tesnym, i Pachapilja **arestovali**<sup>p</sup>.

Rusové však **podnikli**<sup>p</sup> št'áru. Celý les **zaplavily**<sup>p</sup> křiklavé hlasy. **Najednou byl**<sup>i</sup> malý a řídký a Pahapila **chtyli**<sup>p</sup>. (Dov 30 / 8)

- (54) **Náhodou stál**<sup>i</sup> Pavel v té obrovské tlačenci vedle mne a já jsem **slyšela**<sup>i</sup>, že do toho pokřiku sám cosi **volá**<sup>i</sup> [...]

**Slučajno** v étoj užasnoj davke rjadom so mnoj **okazalsja**<sup>p</sup> Pavel, ja **slyšala**<sup>i</sup>, kak v étot gul on tože čto-to **vykričivaet**<sup>i</sup> [...] (Kun 20 / 22)

Similar with Czech *mít* 'have' (no direct counterpart in Russian):

- (55) [...] **měla**<sup>i</sup> jsem aspoň záminku mu zatelefonovat [...] **Sešli**<sup>p</sup> jsme se va kavárně, můj nešťastný fejeton **měl**<sup>i</sup> čtyři stránky, **přečetl**<sup>p</sup> ho, galantně se **usmál**<sup>p</sup> a **řekl**<sup>p</sup>, že je výborný, **dával**<sup>i</sup> mi najevo **od počátku**, že [...]

[...] u menja **našelsja**<sup>p</sup> predlog pozvonit' emu [...] **Vstretilis**<sup>p</sup> my v kafe, moj žalkij fel'eton **zanimal**<sup>i</sup> čtyre stranicy, on **pročel**<sup>p</sup> ego, vežljivo **ulybnulsja**<sup>p</sup> i **skazal**<sup>p</sup>, čto fel'eton prevoschoden, odnako **s samogo načala dal**<sup>p</sup> mne ponjat', čto [...] (Kun 25f. / 31)

- (56) [...] **chytila** jsem najednou Pavla za ruku a Pavel **opětoval** můj stisk, a když pak náměstí **utichlo** a k mikrofonu **přistoupil** zas někdo jiný, **měla** jsem strach, aby mi ruku nepustil, ale **nepustil** ji, **drželi** jsme se dál až do konce manifestace [...]

[...] ja vdrug **schvatila** Pavla za ruku, in on **otvetil** mne na požatie, a kogda potom ploščad' **utichla** i k mikrofonu **podošel** kto-to drugoj, menja **zaili** strach, čto on otpustit moju ruku, no on ne **otpustil**, my **deržalis'** za ruki do samogo konca manifestacii [...] (Kun 21 / 23)

- (57) [...] ani jiní mě nemají moc rádi, však se to **ukázalo**, když jsme **museli** **řešit** tu trapnou aféru, jeden náš redaktor, ženatý muž, **měli poměr** s techničkou od nás [...]

[...] drugie ljudi tože menja ne ljubjat, a èto **vyjasnilos'**, kogda nam **přišlos'** **razbirat'** tu skandal'nuju istoriju, naš redaktor, čelovek ženatyj, **svjazalsja** s montažistkoj iz našego otdela [...] (Kun 23 / 27)

Russian PF with perfect meaning vs. Czech IPF with an extent reading:

- (58) No vot sodержanie ètich ponjatij rešitel'nym obrazom **izmenilos'**. Ierarchija cennostej **byla** polnost'ju **narušena**. To, čto **kazalos'** važnym, **otošlo** na zadnij plan. Meloči **zaslonili** gorizont.

Zásadně se **změnil** jen obsah těchto fenoménů. Hierarchie pojmů se nenávratně **zhroutila**. To, co se **zdálo** důležité, **ustoupilo** do pozadí. Celý obzor **zakrývaly** maličkosti. (Dov 36 / 15)

One more such example (also with za-):

- (59) Jedna ta vytetovaná plachetka se mi **tak líbila**, **že** jsem si **přál** mít ji vytetovanou na prsou taky.

Odin parusnik **tak** mne **ponravilsja**, **čto** ja **zachotel**, čtoby u menja na grudi tože **byl** takoj že. (MP 9)

## 1.7 Result vs. process

Czech can dwell on the process of an event in a chain of events, by using the IPF (Russian cannot):

- (60) A **utíkal** jsem po mostě, tam na druhou stranu, v půli mostu jsem **zůstal stát**, **opřel** jsem se o zábradlí, **oddychoval** a **počkal** jsem, až se mi krov **vrátil** tam, kde **byla** dřív, až jsem si **zklidnil**. A **vrátil** jsem se nazpátek, tam, kde most **přechází** v Mosteckou ulici, **zahnul** jsem dolů k Turecké věži a ke mlejnu a potom Fortnou, kolem soudu jsem odpoledním sluncem **šel** Kostelním náměstíčkem a **vešel** jsem do kostela.

V chrámu nikdo **nebyl**, **bylo** tady příjemně a chládek, **chvíli** jsem se **rozhlížel** a z celého vnitřku kostela jsem **viděl** jenom dvě pokladničky u klekátek. Zase se mi **roztlouklo** srdce. Abych se **ztišil**, **klekl** jsem si na klekátko pod sochu svatého Antoníčka a **dělal** jsem, že se **modlím**. A **s hlavou sklopenou** jsem **šeptal**: [...] **Zvedl** jsem oči a **díval** jsem se do oči svatého Antoníčka, který se na mi **usmíval**. A já jsem **zdrudnul**, **rozhlížel** se a pak jsem **obrátil** pokladničku a **štěrchal** jsem tak dlouho, až mi **vypadla** plná hrst mincí. **Dal** jsem je do kapsy, a zase jsem **poklekl** a hlavu **dal** do dlaní, abych se **uklidnil**.

I ja **pomčalsja** po mostu na druguju storonu, no na polputi, na seredine mosta, **ostanovilsja**, **opersja** o perila i **podoždal**, **poka otdyšus'**, **poka** krov' **vernetsja** tuda, gde ona **byla** ran'se, **poka** ja **otdochnu**. A potom **zašaga**

obratno, tuda, gde most **perechodit'** v Mosteckuju ulicu, tam ja **svernul'** vniz, k tureckoj bašne i k mel'nice, **minoval'** Fortunuju ulicu, sud, **peresek'** zalituju lučami popoldennogo solnca chramovuju ploščad' i **vošel'** v cerkov'.

V chrame nikogo ne **okazalsja**, tam **bylo'** chorošo, prochladno, ja **načal'** **ogljadyvat'sja** po storonam, no ne **uvidel'** ničego, krome dvuch kružek dlja požertvovaniy vozle molitvennyh skameeček. U menja opjat' **zakolotilos'** serdce. Čtoby **uspokoit'sja**, ja **opustilsja** na koleni pod statuej svjatogo Antonija i **sdelal'** vid, čto **moljus'**. **Skloniv** golovu, ja **prošeptal**: [...] Ja **podnjal'** glaza i **vzgljanul'** na svjatogo Antonija, kotoryj **ulybalsja**. I ja **zalilsja** kraskoj, **ogljanulsja**, a potom **perevernul'** cerkovnju kružku i **trjas'** ee do tech por, poka u menja na ladoni ne **vyrosla** kučka monet. Ja **sunul'** ich v karman, opjat' **vstal'** na koleni i **zakryl'** lico rukami, čtoby **otdyšat'sja**. (MP 10f.) (≈ 8 u. 18)

- (61) Pankrat **zasnul'** uže v svoej komnate v vestibule i **odin tol'ko raz** v otdalenií muzykal'no i nežno **prozveneli** stekla v škafach – éto Ivanov, **uchodja**, **zaper'** svoj kabinet. Za nim **prostonala** vchodnaja dver'.

Pankrat ve svém pokojíku ve vestibulu už **usnul'** a **jen jedenkrát** vzdáleně a něžně **zazvonila** skla ve skříních – to Ivanov **při odchodu zamykal'** svou pracovnu. **Pak zanařikaly** venkovní dveře. (RJ 390 / 12)

- (62) On **nadel'** šapočku i **pokazalsja** Ivanu i **v profil'** i **v fas**, čtoby dokazat', čto on – master. – Ona svojimi rukami **sšila** ee mne, - tainstvenno **dobavil'** on.

[...], **nasadil'** si ji a **předváděl'** se **ze všech stran**, aby dokázal, že je Mistr. „Tu čepičku mi vlastnoručně **ušila**“ **dodal'** tajemně. (MM 131 / 110)

- (63) Persikov **zabyl'** o svoich aměbach i **v tečenie polutora časov po očeredi s Ivanovym pripadal'** k steklu mikroskopa.

Persikov **zapomněl'** na svoje měňavky a **půldruhé hodiny střídavě s Ivanovem tiskl'** oko na sklíčko mikroskopu. (RJ 389 / 11)

- (64) [...] **přidal'** jsem se proto ze všech sil k Pavlovým ústům a **přidávali** se **další a další**, **přidal'** se **postupně** celý nás soubor, ale křik náměstí **byl'** strašlivě silný [...]

[...] i potomu izo vsej moči **stala** **podpevat'** Pavlu, k nam **prisoedinilis'** drugie, **ešče i ešče**, i vot **uže pel'** ves' naš chor, no gul na ploščadi **byl'** takim moščnim [...] (Kun 20 / 22)

## 1.8 Foreground vs. background

- (65) Když **přišlo** pozdní jaro, když **bylo'** léto, když se **setmělo** a **byla'** sobota, přešel' jsem osvětlený most, pak **zahnul'** k mlýnu a podle Staré rybárny jsem **krácel'** kolem plotu farní zahrady.

Kogda vesnja **približalas'** k koncu, kogda **bylo'** uže počti leto, odnaždy **v subbotnie sumerki** ja **perešel'** osveščennyj most, a potom **svernul'** k mel'nice i **zašagal** mimo starogo „Rybnogo podvor'ja“ vdol' ogrady cerkovnogo sada. (JR 109)

- (66) A **couval'** jsem, svatý Antonín se **usmíval'** pořád laskavě, a tak jsem **vyběhl'** z kostela do slunce, které **rozpouštělo'** zdi a střechy domečků tak, že jsem **neviděl'**.

I **popjatilsja** von. Svjatoj Antonij po-prežnemu laskovo **ulybalsja**, i ja **vyskočil'** iz chrama na solnce, kotoroe tak **raskalilo** steny i kryši domov, čto ja počti **oslep'**. (MP 11f.)

- (67) Od lučerny k plynové lucerně v průvanu vřeten jepic jsem **vešel**<sup>P</sup> velikými vraty na faru, na dvorku **stála**<sup>I</sup> lucerna, podle zeleninové zahrádky jsem **šel**<sup>Idet</sup> až k osvětleným oknům fary. Podle zdi se **pnula**<sup>I</sup> po latích réva, **ručkoval**<sup>I</sup> jsem vzhůru, a když jsem se **podržel**<sup>P</sup> jednou rukou latě a druhou jsem **odhrnul**<sup>P</sup> úponky a listy, **uviděl**<sup>P</sup> jsem nejdřív stůl potažený zeleným plyšem, a tam **stála**<sup>I</sup> láhev vermutu a sklenka upitá do půl.

I ja **zašagal**<sup>PAA</sup> ot odnogo gazovogo fonarja k drugomu, **prošel**<sup>P</sup> čerez bol'sšie vorota i, okružennyj krutjaščimisja stolbami motyl'kov, **očutilsja**<sup>P</sup> vo dvore doma nastojatelja, gde **sijal**<sup>I</sup> fonar'; ja **minoval**<sup>I/(P)</sup> ogorodik i **priblizilsja**<sup>P</sup> k osveščennym okoškam. Po stene, po natjanutym bečevkam, **vilsja**<sup>I</sup> vinograd, ja **podtjanulsja**<sup>P</sup> i, **deržas**<sup>IA</sup> odnoj rukoj za bečevku, drugoj **otodvinul**<sup>P</sup> v storonu vinogradnye usiki i list'ja. Dlja načala ja **uvidel**<sup>P</sup> stol, pokrytj zelenym pljušem, na ktorom **stojali**<sup>I</sup> butylka vermuta i nedopitaja rjumka. (MP 16)

## 1.9 Adverbial participles

- (68) A **vztyčil**<sup>P</sup> jsem se, a **běžel**<sup>Idet</sup> jsem po vrchní fošně železničního mostu, tam na druhé straně řeky **nakládali**<sup>I</sup> jetel růžák, a když jsem **přeběhl**<sup>P</sup> most a **díval**<sup>I</sup> jsem se dolů, **viděl**<sup>I</sup> jsem, že ten muž v bílé košili **není**<sup>I</sup> nikdo jiný než pan děkan.

Potom ja **vstal**<sup>P</sup> i **pobežal**<sup>P</sup> po verchnemu nastilu železnodorožnogo mosta; na toj storone reki **ukladyvali**<sup>I</sup> na voz rozovyj klever, i ja, **minovav**<sup>PAP</sup> most i **posmotrev**<sup>PAP</sup> vniz, **uvidel**<sup>P</sup>, čto mužčina v belo j rubaške – ne kto inoj, kak gospodin nastojatel'. (JR 111f.)

- (69) Puškina rugaet na čem svet stoit i vse vremja kričit: „Kurolesov, bis, bis!“ **govorili**<sup>I</sup> gost', trevožno **dergajas**<sup>IA</sup>. **Uspokoivšis**<sup>PAP</sup>, on **selp**, **skazal**<sup>P</sup>: - A vpročem, bog s nim, - i **prodolžal**<sup>I</sup> besedu s Ivanom: - Tak iz-za čego že vy popali sjuda?

- Iz-za Pontija Pilata, - chmurno **gljanuv**<sup>PAP</sup> v pol, **otvetil**<sup>P</sup> Ivan.

- Kak?! - **zabyv**<sup>PAP</sup> ostorožnost', **kriknul**<sup>P</sup> gost' i sam sebja **zažal**<sup>P</sup> rot rukoj, - potriasajuščee sovpadenie! Umoljaju, umoljaju, rasskažite!

Počemu-to **ispytyvaja**<sup>IA</sup> doverie k neizvestnomu, Ivan, pervonačal'no **zapinajas**<sup>IA</sup> i **robeja**<sup>IA</sup>, a potom **osmelev**<sup>PAP</sup>, **načal**<sup>P</sup> **rasskazyvat'** včerašnjuju istoriju na Patriaršich prudach. [...] Gost' ne **rjadil**<sup>I</sup> Ivana v sumassšedšie, **projavil**<sup>P</sup> veličajšij interes k rasskazyvaemomu i po mere razvitija éтого rasskaza, nakonec, **prišel**<sup>P</sup> v vostorg. On **to i delo preryval**<sup>I</sup> Ivana vosklicanijami: [...] Opisanie užasnoj smerti Berlioza slušajauščij **sopровоždal**<sup>I</sup> zagadočnym zamečaniem, pričem glaza ego **vspychnuli**<sup>PAA</sup> zloby: [...] Kot, **plativšij**<sup>PPart</sup> konduktorše, črezvyčajno **razveselil**<sup>P</sup> gostja, i on **davilsja**<sup>I</sup> ot tichogo smeča, **gljadja**<sup>IA</sup>, kak vzvolnovannyj uspechom svoego povestvovanija Ivan ticho **prygaj**<sup>IPrát</sup> na kortočkach, **izobražaja**<sup>IA</sup> kota s grivennikom vozle uchov.

- I vot, - **rasskazav**<sup>PAP</sup> pro proisšestvie v Griboedove, **zagrustiv**<sup>PAP</sup> i **zatumanivšis**<sup>PAP</sup>, Ivan zakončil: - ja i **okazalsja**<sup>P</sup> zdes'.

„Proklíná Puškina, až se hory zelenají, a vykřikuje: Kurolesov, opakovat, opakovat!“ **vykládal**<sup>I</sup> host a křečovitě sebou **škubal**<sup>I</sup>. Pak se **uklidnil**<sup>P</sup> a **sedl**<sup>P</sup> si: „Ostatně, bůh s ním,“ **dodal**<sup>P</sup> a **pokračoval**<sup>I</sup> v přerušném rozhovoru: „Proč jste vlastně tady?“

„Kvůli Pilátovi Pontskému,“ **vysvětloval**<sup>I</sup> Ivan, chmurně **zahleděný**<sup>PPart</sup> do země.

„Cože!“ **vyjekl**<sup>P</sup> host, který **zapomněl**<sup>P</sup> na opatrnost, ale hned si **zakryl**<sup>P</sup> ústa rukou.

„To je fantastická shoda! Pro všechno na světě vás prosím, vypravujte!“

Náš básník k němu **pocítil**<sup>P</sup> důvěru a **začal**<sup>P</sup> zpočátku **zajímavě**<sup>Adj</sup> a **rozpačitě**<sup>Adj</sup>, ale postupně stále **přesvědčivěji**<sup>Adj</sup> líčit, co se včera událo na Patriarchových rybnících.

[...] **Nepokládal**<sup>I</sup> Ivana za blázna, doslova mu **visel**<sup>I</sup> na rtech a nakonec **upadl**<sup>P</sup> přímo v nadšení. Často vypravěče **přerušoval**<sup>I</sup> výkřiky: [...] Když se Ivan **zmínil**<sup>P</sup> o Berliozově

tragické smrti, neznámý **utrousil**<sup>P</sup> záhadně a přitom mu zlostně **zajiskřilo**<sup>PAA</sup> v očích: [...] **Platící**<sup>Part</sup> kocour ho mimořádně **rozveselil**<sup>P</sup>, až se **zakuckal**<sup>PAA</sup> tichým smíchem, **pozorovali**<sup>I</sup> básníka, jak povzbuzen úspěchem svého vyprávění tiše **hopká**<sup>IPräs</sup> v podřepu po pokoji a **předvádí**<sup>IPräs</sup> kocoura s desetníkem ukrytým ve vousech. „No vidíte,“ **uzavřel**<sup>P</sup> nakonec **smutně**<sup>Adj</sup> Bezprizorný, když **vyličil**<sup>P</sup> příhodu v Gribojedovovi, a **zakabonil**<sup>P</sup> se: „A tak jsem se **ocitl**<sup>P</sup> tady.“ (MM 128f. / 107f.) (≈ 14)

Czech gerund/converbs ('transgressives') are rather archaic; some examples were found nevertheless ((70) is a bible quote, (72) might not be an adequate, contemporary translation):

(70) A Ježíš **vsedna**<sup>PAP</sup> na lodičku **plavil**<sup>Idet</sup> se do země Kafarnaum... (JR 107)

„I Iisus, **sevp**<sup>PAP</sup> lodku, **otpravilsja**<sup>P</sup> v Kapernaum...“

(71) [...] kogda soedinennaja amerikano-russkaja kompanija **vystroila**<sup>P</sup>, **načav**<sup>PAP</sup> s ugla Gazetnogo pereulka i Tverskoj [...]

[...] kdy spojená americko-ruská společnost **vystavěla**<sup>P</sup> ve středu města, **počínaje**<sup>(IAP)</sup> rohem Novinové uličky a Tverské [...] (RJ 388 / 8f.)

(72) Rannim utrom **pribyl**<sup>P</sup> v čast' nevzračnyj oficer. **Sudja**<sup>IAP</sup> po očkam – ideologičeskij rabotčik.

Brzy ráno k útvaru **přijel**<sup>P</sup> nevzhledný oficír. **Soudě**<sup>(IAP)</sup> podle brýlí ideologický pracovník. (Dov 31 / 9)

Other Russian non-finite verb forms: participles (less often)

(73) **Vyšli**<sup>P</sup> jsme tedy z nemocnice a brzo **došli**<sup>P</sup> ke skupině novostaveb, které nesouladně **trčely**<sup>P</sup> jedna vedle druhé z neurovnaného prašného terénu (bez trávníků, bez chodníků, bez silnice) a **tvořily**<sup>I</sup> smutnou scénérii na konci města hraničícího s prázdnou rovinou dalekých polí.

My **vyšli**<sup>P</sup> iz bol'nicy i vskore **okazalis'**<sup>P</sup> sredi novostroek, vrazbrod **torčavšich'** na izrytom pyl'nom prostranstve (ni gazona, ni trotuarov, ni šosse) i **javljavšich'** pečal'nyj pejzaž na okraie goroda, okajmlennogo goloj ravninoj dal'nich polej. (Kun 10 / 12)

## 2 Iterativity, habituality

### 2.1 The Russian PF in repetitive contexts

#### 2.1.1 Summation reading of the PF

(74) Mne, naprimer, **otkazali**<sup>P</sup> **dvoe**.

Například mě **odmítli**<sup>P</sup> hned **dva**. (Dov 27 / 6)

(75) Vo-pervych, na meste pokojnogo Vlasa **pojavilsja**<sup>P</sup> Pankrat, ešče molodoj, no podajuščij bol'sie nadeždy zoologičeskij storož, institut **stali**<sup>P</sup> **topit'**<sup>I</sup> ponemnogu. A letom Persikov pri pomošči Pankrata na Kljaz'me **pojmal**<sup>P</sup> **četyrnadcat'** **štuk** vul'garnych žab. V terrarijach vnov' **zakupela**<sup>PAA</sup> žizn'...

Za prvé: namísto nebožtíka Vlase se **objevil**<sup>P</sup> Pankrat, dosud mladý, ale velice nadějný vrátný, a ústav **začali**<sup>P</sup> pomaloučku **vytápět'**<sup>I</sup>. V létě Persikov s Pankratovou

pomocí **ulovil** v Kljazmě **čtrnáct kusů** obyčejných ropuch. V teráriích znovu **vzkypěl** život... (RJ 387 / 8)

- (76) [náměstí] (po němž jsem **nesčetněkrát prošel** jako dítě, jako chlapec i jako mladík) [...]

[...] (**nesčetnoe číslo raz** ja **prošel** po nej rebenkom, mal'čikom, junošej) [...] (Kun 7 / 7)

## 2.1.2 Vivid-exemplifying and potential use of the PF

- (77) [...] v poledne jsme **neměli** čas ani poobědvat, **snědli**<sup>Prät</sup> jsme na sekretariátě ČSM dvě suché housky a pak jsme se zase **třeba** celý den **neviděli**<sup>Prät</sup>, **čekávala**<sup>lfreq</sup> jsem na Pavla kolem půlnoci [...]

[...] v polden' nam ne **chvatalo** vremeni daže poobedat', **s'edim**<sup>Präs</sup>, **byvalo**<sup>(lfreqPrät)</sup>, na sekretariate dve suchie bulki, a potom snova počti celyj den' ne **vidimsja**<sup>Präs</sup>, **ždala** ja Pavla **obyčno** k polunoči [...] (Kun 21 / 23f.)

- (78) Banal'nyj gandon ne **pomožet**.

Tady vobyčejná šprcka **nepomůže**. (Dov 49 / 28)

- (79) [...] podobně jako **třeba** mladý houslista **nemůže** se dost dobře soustředit na obsah skladby, **dokud nezvládne** manuální techniku natolik, aby na ni mohl při hře přestat myslet.

[...] podobno tomu, kak, **dopustim**, molodoj skripač ne **smožet** dostatočno chorošo sosredotočit'sja na sodernii sočinenija, **poka** ne **ovladeet** technikoj igry nastol'ko, čtoby vo vremja ispolnenija voobšče ne dumat' o nej. (Kun 35 / 40)

- (80) Kakož už tam raj... Takich i v disbat ne **primuť**<sup>Präs</sup>... A ja na ètom fone, **možet**, i **proskoču**<sup>Präs</sup> kak bespartijnyj...

Kdepak ty a do ráje... Ty **by** snad **nevzali**<sup>(Prät)Konj</sup> ani k pétépákum... Takže na takovýmhle pozadí **bych** se tam **propasírovat**? **mohi**<sup>(Prät)Konj</sup>, kór když sem nestráník... (Dov 48 / 27)

## 2.2 Iterativity

- (81) Nočnaja smena **dvaždy otvazyvala** ključ i **vorovala** produkty. Daže muka **byla** **s'edena**<sup>(p)Part</sup> [...]

Noční směně se **dvakrát podařilo** klíče **odvázat** a potraviny si **nakrást**. Dokonce i mouku **sežrali** [...] (Dov 49f. / 29)

Also Czech IPF in iterative contexts vs. Russian adverbial participles:

- (82) A tak **když obešel** **několikrát** pokoj, zase **sklonil** a **postavil** na zem ty svoje kuchařky.

**Obojdja**<sup>AP</sup> **neskol'ko raz** komnatu, on opjat' **naklonilsja** i **postavil** kucharok na stol. (MP 16)

- (83) Byli jsem nešťastný, jak jen **může** **být** nešťastný dvacetiletý chlapec, když **je** bez ženy; chlapec ještě dosti nesmělý, který **poznal** až dosud fyzickou lásku jen **několikrát**, letmo a špatně, a který se jí přitom v mysli **nepřetržitě obírá**.

Ja **stradal**, kak tol'ko **možet** **stradat'** dvadcatiletnij paren', esli u nego net ženščiny; **poznavšij**<sup>pPart</sup> fizičeskiju ljubov', **možet**, **raz-drugoj**, pričem beglo i plocho, i myslenno ne **perestajuščij**<sup>iPart</sup> **zanimat'sja** eju, takoj paren' ešče dostatočno robok. (Kun 37 / 43)

## 2.3 Distributivity

distributive Aktionsart with *po-* just once (in Russian):

- (84) [...] lidi se tehdy **zbláslili**, na všechno **plivali** [...]  
 [...] ljudi s uma **poschodili**<sup>pAA</sup>, vse **oplevyvali** [...] (Kun 23 / 26)

Russian summation meaning not possible anymore when it is clear from the context that it is one after the other (unlike Czech, which can use the IPF):

- (85) [...] **projednávali** jsme ten případ mnoho hodin, **pozvali** jsme si **postupně k rozhovoru**<sup>sg</sup> **manželku, techničku i svědky z jejich pracoviště**, **snažili** jsme se případ **pochopit** a **být** spravedliví, redaktor **dostal** stranickou důtku [...]

[...] my **razbiral**i delo mnogo časov **podriad**, **priglašali** dlja **razgovora**<sup>sg</sup> **vsech po-očeredno, ženu, montážistku i svidetelej-služivcech**, **stremjas'**<sup>iAP</sup> obsudit' p vopros so vsech storon i **sobljusti** ob"ektivnost', redaktor **polučil** partijnyj vygovor [...] (Kun 23 / 27)

- (86) [...] chtěl mě zbavit trémy, bylo to od něho milé, **poznala** jsem už chvastounů, co se **umějí**<sup>iPräs</sup> jen vytahovat [...]

[...] on chotel pomoč' mne spravit'sja s moim volneniem, kak éto milo s ego storony, ja **znavala**<sup>ifreq</sup> stol'kich fanfaronov, kotorye **umeli**<sup>iPrät</sup> razve čto povystavljat'sja [...] (Kun 25 / 30)

- (87) [...] všichni se **polekaně otočili** [...]  
 [...] vse **ispuganno oboračivalis'** na moj krik [...] (JR 107)

- (88) Čtoby popast' v štrafnoj izoljator lagerja osobogo režima, nužno soveršit' kakoe-to fantastičeskoe zlodejanie. Kak ni stranno, éto **udavalos'** **mnogim**.

Aby se člověk dostal do korekce v táboře se zostřeným režimem, musel se dopustit padoušství vskutku fantastického. Je to možná s podivem, ale **kdekomu** se to **podařilo**. (Dov 43 / 22)

All vs. Every, Russian summation meaning of the PF:

- (89) V leninskoj komnate ochraniki **zatejali** **igru**. Ona nazyvalas' „Tigr idet“. **Vse uselis'** za stol. **Vypili po stakanu** zverboja. **Zatem** efrejtor Kunin **proiznes**: [...]

V leninské světnici **začala** skupina bachařů **hrát** společenskou hru. Jmenovala se „tygr de“. **Všichni** se **posadili** za stůl. **Každý do sebe vrazil** sklenici kořalky zvané zvířetník. **Pak** svobodník Kunin **zařval**<sup>pAA</sup>: [...] (Dov 48 / 28)

Russian IPF because of distributivity vs. Czech IPF because of duration:

- (90) Delo **osložnilo**<sup>P</sup> tem, čto „Zona“ **prichodila**<sup>I</sup> častjami.  
Celá záležitost se dál **zkomplikovala**<sup>P</sup> tím, že Lágr **přicházel**<sup>I</sup> po částech. (Dov 28 / 7)

Non-finite vs. finite once more:

- (91) Namerenija svoego otnositel'no zagranicy Persikov **ne vyponil**<sup>P</sup>, i 20-j god **vyšel**<sup>P</sup> ešte chuže 19-go. **Proizošli**<sup>P</sup> **sobytiya i pritom odno za drugich**.  
Svůj úmysl odjet do zahraničí **neuskutečnil**<sup>P</sup>, ale dvacátý rok **byl**<sup>I</sup> ještě horší než devatenáctý. **Došlo**<sup>P</sup> **k různým událostem, které následovaly jedna za druhou**. [...] (RJ 386 / 6)

Some more examples:

- (92) [...]: v to vremja, kak v diske vne luča zernistye aměby **valjalis**<sup>I</sup> vjalo i bespomoščno, v tom meste, gde **prolegali**<sup>I</sup> krasnyj zaostrennyj meč, **proischodili**<sup>I</sup> **strannye javlenija**. V krasnoj polosocke **kipela**<sup>I</sup> žizn'. Seren'kie aměby, **vypuskaja**<sup>IA</sup><sup>P</sup> ložonožki, **tjanulis**<sup>I</sup> izo vseh sil v krasnuju polosu i v nej (slovno volšebnym obrazom) **oživali**<sup>I</sup>. Kakaja-to sila **vdohnula**<sup>P</sup> v nich duch žizni. Oni **lezli**<sup>I</sup> staej i **borolis**<sup>I</sup> drug s drugom za mesto v luče. [...] Oni **razvalivalis**<sup>I</sup> na časti v luče, i **každaja iz častej v tečenie dvuch sekund stanovilas**<sup>I</sup> novym i svežim organizmom. Ėti organizmy **v neskol'ko mgnovenij dostigli**<sup>P</sup> **rosta i zrelosti** liš' zatem, **čtoby** v svoju očered' totčas že **dat**<sup>P</sup> novoe pokolenie. V krasnoj polose, a potom i vo vsem diske **stal**<sup>P</sup> tesno, i **načalas**<sup>P</sup> neizbežnaja bor'ba.

[...]: zatímco se zrnité měňavky mimo dosah paprsku **válely**<sup>I</sup> pod sklíčkem ochable a bezmocně, v místě, kam **dopadali**<sup>P</sup> červený špičatý meč, **došlo**<sup>P</sup> **k podivným jevům**. V červeném proužku **kypěli**<sup>I</sup> život. Šedivé měňavky **natahovaly**<sup>I</sup> svoje panožky a **táhly**<sup>I</sup> se ze všech sil k červenému pruhu a tady jako kouzlem **oživaly**. Jakási nesmírná síla jim **vdechla**<sup>P</sup> život. **Plazily**<sup>I</sup> se v houfu a **zápasily**<sup>I</sup> mezi sebou o místo v paprsku. [...] **rozpadaly**<sup>I</sup> se v paprsku na jednotlivé části a **každá z nich se během dvou vteřin vyvinula**<sup>P</sup> v nový svěží organismus. Tyto organismy **v několika okamžicích dorůstaly**<sup>I</sup> a **vyzrávaly**<sup>I</sup> jen proto, **aby** okamžitě **daly**<sup>P</sup> **vzniknout**<sup>P</sup> nové generaci. V červeném proužku a později i v celém políčku **začalo**<sup>P</sup> **být**<sup>I</sup> těsno a **počal**<sup>P</sup> nevyhnutelný boj. (RJ 393f. / 16f.)

- (93) V kabinete učenogo **načalos**<sup>P</sup> čert znaet čto: golovastiki **raspolzalis**<sup>I</sup> iz kabineta po vsemu institutu, v terrarijach i prosto na polu, vo vseh zakoulkach, **zavyvali**<sup>I</sup> zyčnye chory, kak na bolote. Pankrat, i tak **bojavšijsja**<sup>IPart</sup> Persikova kak ognja, teper' **ispytyvali**<sup>I</sup> po otnošeniju k nemu odno čuvstvo: mertvennyj užas. **Čerez nedelju** i sam učenyj **počuvstvoval**<sup>P</sup>, čto on **šaleet**<sup>I</sup>.

V profesorově pracovně **vypukla**<sup>P</sup> pohroma: pulci se **rozlezli**<sup>P</sup> z pracovny po celém ústavu, do terárií i jednoduše po podlaze, a ve všech koutech se **rozskřehotaly**<sup>PAA</sup> hluče sbory jako v bažinách. Pankrat, který se beztak Persikova **bál**<sup>I</sup> jako ohně, teď **cítil**<sup>I</sup> smrtelnou hrůzu. **Za týden** dokonce i sám vědec **poznal**<sup>P</sup>, že **ztrácí**<sup>I</sup> rozum. (RJ 396 / 18)

Possibly inadequate translation:

- (94) Soldaty **vozvraščalis**<sup>I</sup> **poodinočke**.  
Vojáci se **vraceli**<sup>I</sup> **po jednom, postupně**. (Dov 50 / 30)
- (95) Parni **tolpilis**<sup>I</sup> vozle instruktora.  
Mládenci se kolem cvičitele **začali**<sup>P</sup> doslova **rojit**<sup>I</sup> ... (Dov 49 / 28)



## 2.4 Habituality

### 2.4.1 Czech verbal marking of habituality

#### 2.4.1.1 Indeterminate verbs of motion

- (96) Skoro všichni k nám **chodili**<sup>ind</sup> do pivovaru, když **byla**<sup>i</sup> zabijačka, když **byl**<sup>i</sup> čas koroptví a zajíců, a hlavně když **byl**<sup>i</sup> čas hlavních zkoušek.

Čut' li ne vse oni **chodili**<sup>ind</sup> k nam v pivovarnju: kogda **zabivali**<sup>i</sup> svinej, kogda **byl**<sup>i</sup> sezon ochoty na kuropatok i zajcev, a glavnoe, kogda **nastupala**<sup>i</sup> pora general'nych repeticij. (Sext 145)

- (97) Do pivovaru na čtené zkoušky **přišly**<sup>p</sup> i manželky pánů, kteří k nám **chodili**<sup>ind</sup> na zabijačky a koroptve a krajíce mazané sádlem, a já jsem **seděl**<sup>i</sup> v kuchyni a docela jsem **nemohl**<sup>i</sup> **chodit**<sup>ind</sup> z toho, co jsem **slyšel**<sup>i</sup> a **viděl**<sup>i</sup>.

V pivovarnju na čitki **prichodili**<sup>i</sup> ženy tech, kto **byval**<sup>ifreq</sup> u nas na mjasnych pirach i el kuropatok i lomti chleba so smal'cem, i ja sidel v kuchne, ne v silach **sdvinut'sja**<sup>p</sup> s mesta ot togo, čto **videl**<sup>i</sup> i **slyšal**<sup>i</sup>. (Sext 149)

- (98) Ona **prichodila**<sup>i</sup> ko mne **každý den**<sup>i</sup>, a **ždat**<sup>i</sup> ee ja **načinal**<sup>i</sup> s utra. [...] V staren'kom osobnjačke, gde mne **prinadležal**<sup>i</sup> étot podval, **znali**<sup>i</sup>, konečno, **videli**<sup>i</sup>, čto **prichodit**<sup>i</sup> ko mne kakaja-to ženščina, no imeni ee ne **znali**<sup>i</sup>.

**Chodila**<sup>indet</sup> ke mně **denně** za poledne a já na ni **čekával**<sup>ifreq</sup> už od rána. [...] Ve staré vilce, kde jsem **bydlel**<sup>i</sup> ve sklepním bytě, to samozřejmě **věděli**<sup>i</sup>, **všimli**<sup>p</sup> se, že ke mně **chodí**<sup>ind</sup> nějaká žena, ale **neznali**<sup>i</sup> její jméno. (MM 135 / 112f.)

Czech IPF motion verb, but not for habituality, but for duration:

- (99) Vot tol'ko **zrja** on **načal**<sup>p</sup> **spekulirovat**<sup>i</sup> ryboj, kotoruju **privozili**<sup>i</sup> iz Afrikandy.

Jedině, co **neměli dělat**<sup>i</sup>, **byl**<sup>i</sup> obchod s rybami, které **přiváželi**<sup>i</sup> z Afrikandy. (Dov 38 / 16f.)

- (100) No rjadem **žila**<sup>i</sup> prodavščica Tonečka s mužem-élektromonterom. Ešče **byla**<sup>i</sup> doč', **priežžavšaja**<sup>iPart</sup> tol'ko na kanikuly.

Hned vedle však **bydlela**<sup>i</sup> prodavačka Toněčka s mužem elektrikářem. **Měli**<sup>i</sup> také dceru, ale ta **příjížděla**<sup>i</sup> jen na prázdniny. (Dov 51 / 30)

#### 2.4.1.2 Frequentatives

|         |                                                                  |                                                 |
|---------|------------------------------------------------------------------|-------------------------------------------------|
| Kun:    | <b>spával</b> <sup>ifreq</sup> / <b>sedával</b> <sup>ifreq</sup> | - <b>spali</b> <sup>i</sup>                     |
|         | když <b>býval</b> <sup>ifreq</sup>                               | - <b>ostavajas</b> <sup>iAP</sup>               |
| Hrabal: | <b>býval</b> <sup>ifreq</sup>                                    | - <b>často prebyvali</b> <sup>i</sup>           |
|         | <b>býval</b> <sup>ifreq</sup>                                    | - <b>byla</b> <sup>i</sup>                      |
|         | <b>míval</b> <sup>ifreq</sup>                                    | - <b>byvala</b> <sup>ifreq</sup>                |
|         | <b>plavíval</b> <sup>ifreq</sup>                                 | - <b>plaval</b> <sup>i</sup>                    |
|         | <b>chodili</b> <sup>ind</sup>                                    | - <b>byval</b> <sup>ifreq</sup>                 |
| MM:     | <b>videl</b> <sup>i</sup>                                        | - <b>vídával</b> <sup>ifreq</sup>               |
|         | <b>vychodili guljat</b> <sup>i</sup>                             | - <b>chodíval</b> <sup>ifreq</sup> na procházky |
|         | <b>byl</b> <sup>i</sup>                                          | - <b>bývala</b> <sup>ifreq</sup>                |
|         | <b>načinal ždat</b> <sup>i</sup>                                 | - <b>čekával</b> <sup>ifreq</sup>               |

|      |                                                   |                                           |
|------|---------------------------------------------------|-------------------------------------------|
|      | <b>sidela<sup>i</sup></b>                         | - <b>sedávala<sup>ifreq</sup></b>         |
| RJ:  | <b>imel<sup>i</sup></b> [strannost <sup>i</sup> ] | - <b>míval<sup>ifreq</sup></b> [ve zvyku] |
| Dov: | <b>govoril<sup>i</sup></b>                        | - <b>říkával<sup>ifreq</sup></b>          |
|      | <b>vyzyvala<sup>i</sup></b>                       | - <b>bývala<sup>ifreq</sup></b>           |
|      | <b>koril<sup>i</sup></b>                          | - <b>kárával<sup>ifreq</sup></b>          |

### 2.4.1.3 Secondary imperfectives

SIs with -va: *pojmenovávat*, *stávat se* (102 u. 118), *dostávat*, *nechávat* (102), *dávat* (104), *podávat* (103), *prodávat* (107, below), *otdávat*.

Three prefixed multiplicative verbs (47: *poklepávat*, 48: *poškubávat*, 101: *střepávat*) / Czech native speaker about (101): it is about watching the leaves falling (process reading)

(101) V podval'čike **slyšalsja<sup>i</sup>** smech, derev'ja v sadu **sbrasyvali<sup>i</sup>** s sebja posle doždja oblomannye vetočki, belye kisti.

Ve sklepě se **ozýval<sup>i</sup>** smích, zatímco keře v zahradě **střepávaly<sup>i</sup>** po dešti ulámané větvičky a bílé hrozny. (MM 136 / 114)

(102) [...] ale **stávalo<sup>i</sup>** se, že **nerozuměla<sup>i</sup>** anekdotě, kterou jí **vyprávěli<sup>i</sup>** kolegové; **nechávala<sup>i</sup>** se strhnout všemi entuziasmy doby, ale ve chvíli, kdy **byla<sup>i</sup>** svědkem nějaké politické praktiky konané ve smyslu zásady účel světí prostředky, **stávala<sup>i</sup>** se stejně nechápavou, jako když **stála<sup>i</sup>** před anekdotou svých kolegů; však proto také soudruzi **usoudili<sup>i</sup>**, že [...]

[...] no, **slučalos<sup>i</sup>**, ne **ponimala<sup>i</sup>** anekdota, **rasskazannogo<sup>ppart</sup>** ej tovariščami; ona **dávala<sup>i</sup>** uvleč' sebja vsemi vostorgami epochi, no v minutu, kogda **okazyvalas<sup>i</sup>** svidetelem kakogo-libo političeskogo načinanija, soveršennogo po principu „cel' opravdyvaet sredstva“, **stanovilas<sup>i</sup>** takoj že neponjatljivoj, kak v slučae s rasskazannym anekdotom, vot počemu tovarišči i **rassudili<sup>i</sup>**, čto [...] (Kun 35 / 40)

(103) A nejen matka, ale to už **přišli<sup>i</sup>** ostatní herci, všechny jsem je **znal<sup>i</sup>**, protože jsem jim **mazal<sup>i</sup>** chleba se sádlem a **podával<sup>i</sup>** láhve piva, taky **přišli<sup>i</sup>** v pěkných šatech, každý **měl<sup>i</sup>** pod paží srolovanou úlohu, když se **stmívalo<sup>i</sup>**, tak náměstím **chodilo<sup>lind</sup>** sem a tam deset bílých srolovaných divadelních knížek [...]

I tak **vela<sup>i</sup>** sebja ne tol'ko matuška, no i drugie aktery; ja vseh ich **znal<sup>i</sup>**, potomu čto **namazyval<sup>i</sup>** im smalec na chleb i **podával<sup>i</sup>** butylki s pivom, oni tože **prichodili<sup>i</sup>** prinarjažennye, i u každogo iz nich pod myškoj **torčala<sup>i</sup>** svernutaja v trubku rol', tak čto v **sumerkach** po ploščadi **raschaživalo<sup>i</sup>** tuda-sjuda desjat' belych truboček [...] (Sext 147)

(104) **Je<sup>i</sup>** ze šesti dětí, a jeho tatínek **měl<sup>i</sup>** tak velikou sílu, že mu děti **dávaly<sup>i</sup>** na stůl ořech, tatínek **zvedl<sup>i</sup>** prs a lu ho! prstem **louskal<sup>i</sup>** ořechy líp než louskáčkem!

On odin iz šesti detej, i ego otec **byl<sup>i</sup>** takim sil'nym, čto, kogda synov'ja **klali<sup>i</sup>** na stol ořech, on – raz pal'cem! – **raskalyval<sup>i</sup>** ego lučše, čem ščipsy dlja ořechov. (MP 13)

3 SIs with different suffixes, all in Dovlatov translation: Native speakers' reactions

-(105) implies graduality [unlike what the Russian example suggests]

-(106), (107): adequate use of SIs, to stress the regularity of the repetitions (but PF would have been ok as well)

- (105) Krome toho v odinočestve – **pil**<sup>I</sup>, esli **mešali**<sup>I</sup> – **dralsja**<sup>I</sup>. A takže **dopuskal**<sup>I</sup> – „incidenty ženskogo porjadka“. (Po vyraženi ju zampolita Churieva.)

Kromě toho **rád pil sám**, když mu někdo **vadil**, tak se **pral** a **občas** se **dopouštěl** i „excesů ženského druhu“. (jak tomu učeně **říkal** politruk Churijev.) (Dov 30f. / 9)

- (106) V étom mire **ubivali**<sup>I</sup> za pačku čaja.

V tomto světě se **zabíjelo**<sup>I</sup> pro balíček čaje. (Dov 35f. / 14)

- (107) Vot tol'ko **zrja** on **načal**<sup>P</sup> **spekulirovat**<sup>I</sup> ryboj, ktoruju **privozil**<sup>I</sup> iz Afrikandy. Miščuk **vymenival**<sup>I</sup> ee u nencev i **otdaval**<sup>I</sup> družku-chaldeju po šest' rublej za kilogramm.

Jedině, co **neměli dělat**, **byl**<sup>I</sup> obchod s rybami, které **přivážel**<sup>I</sup> z Afrikandy. Miščuk je výhodně **směňoval**<sup>I</sup> s Něnci a **pak** je **prodával**<sup>I</sup> chaldejskému přítelíčkovu po šesti rublech za kilo. (Dov 38 / 16f.) (≈ 99)

## 2.4.2 Equivalent lexical items

Regular: Czech PF vs. Russian SI

- (108) **Octli**<sup>P</sup> jsme se **často** při různých studentských příležitostech všichni tři spolu [...]

Na raznych studenčeskich meroprijatijach my **neredko** **okazyvalis**<sup>I</sup> vse troe vmeste [...] (Kun 42 / 50)

- (109) Pan děkan spurný, když **vykládal**<sup>I</sup> biblickou dějepravu, **uměl**<sup>I</sup> tak tiše a něžně **hovořit**<sup>I</sup>, že jsme ve třídě **pokaždé měli**<sup>I</sup> dojem, že pan děkan není ani duchem ve třídě, ani v našem městěčku, ale docela někde jinde, tam někde v zemi Kanaán, **plavil**<sup>IPrát</sup> se jezerem Genezaretským nebo **byl**<sup>IPrát</sup> v Tarsu. A ze všech zázraků, které se tenkrát **staly**<sup>P</sup>, nejpěknější **byl**<sup>I</sup> příběh o svatém Pavlovi.

Gospodin nastojatel' Spurnyj, **izlagaja**<sup>IAP</sup> biblejskuju istoriju, **umel**<sup>I</sup> **govorit**<sup>I</sup> takim tichim i nežnym golosom, čto my **vsjakij raz dumali**<sup>I</sup>, budto dušoj on ne v klasse i voobšče ne v našem gorodke, a gde-to v drugom meste, gde-to v zemle Chanaanskoj, **plavaet**<sup>IPrás</sup> po Genisaretskomu ozeru ili **prebyvaet**<sup>IPrás</sup> v Tarse. Iz vsego, čto **proischodilo**<sup>I</sup> v te vremena, samoe čudesnoe **priključilos**<sup>P</sup> so svjatym Pavlom. (JR 106)

- (110) [...] kde se jen **objevily**<sup>P</sup> ruce pan děkana, které **odebraly**<sup>P</sup> růžák.

[...] gde **vsjakij raz pokazyvalis**<sup>I</sup> tol'ko ruki nastojatelja, kotoryj ego **prinimal**<sup>I</sup>. (JR 112)

- (111) **Mnogie** iz 30 tysjač mechanických ékipažej, **begavšie**<sup>idetPart</sup> v 28-m godu po Moskvě, **proskakivali**<sup>I</sup> po ulice Gercena, **šurša**<sup>IAP</sup> po gladkim torcam, i **čerez každyju minutu** s gulom i skržetom **skatylsja**<sup>I</sup> s Gercena k Mochovoj tramvaj 16, 22, 48 ili 53-go maršruta.

**Mnohé** z třiceti tisíc drožek, které v osmadvacátém **jezdily**<sup>indet</sup> po Moskvě, **proklouzly**<sup>P</sup> Gercenovou ulicí a **zasvištěly**<sup>AA</sup> na hladkém dřevěném dláždění; **každou minutu** se s řinkotem a skřipěním **přehnal**<sup>P</sup> od Gercenovy ulice k Mechové tramvaj číslo 16, 22, 48 nebo 53. (RJ 389 / 10)

### 2.4.3 Russian Sis vs. Czech base verbs

- (112) A u mariánského sloupu **chodili** sem a tam dospělí, ruce na zádech nebo v prstech hůlečku, **každou chvíli** se **podívali** na hodinky, jako by **měli** někam jet vlakem, a moje matka se **procházela** chvíli s dospělými, pak zase **prošla** korzem, jako by někoho **hledala**.

A u kolonny v čest' Devy Marii **prochaživalis** vzroslye – založiv za spinu ruki ili s trostočkami; oni **to i delo posmatrivali** na časy, kak budto bojalis' opozdat' na poezd, i moja matuška kakoe-to vremja **progulivalas** vmeste s nimi, a potom **vychodila** na glavnuju ulicu, točno kogo-to **razyskivaja**<sup>AP</sup>. (Sext 146)

- (113) Dolžnost' Alichanova byla poistine suč'ej. Tem ne menee Boris dobrosovestno **vypolnjal** svoi objazannosti.

Alichanovova funkce byla věru svinská. Boris nicméně **všechny** své povinnosti **plnil** poctivě. (Dov 44 / 22)

- (114) – Do čego vy égocentričnyj, Pachapil'! – ostorožno **koril** ego zampolit.

Gustav **smuščalsja**, **prosíl** list bumagi i korjavo **vyvodil**:

„Včera, sego goda, ja **zloupotrebil** alkohol'nyj napitok. Posle čego **uronil** v grjaz' soldatskoe dostoinstvo. Vpred' obeščaju. Rjadovoj Pachapil'“.

Posle nekotorigo razdum'ja on **vsegda dobavljal**:

„Prošu ne otkazat'“.

Zatem **prichodil** den'gi ot tetuški Réét. Pachapil **bral** v magazine litr šartreza i **otpravljalsja** na kladbišče. Tam v zelenom polumrake **beleli** kresty. Dal'se, na kraju vodoema, byla zapuščennaja mogila i rjadom – fanernyj obelisk. Pachapil' gruzno **sadilsja** na cholmik, **vypival** i **kuril**.

- Éstoncy dolžny žít v Kanade, - ticho **bormotal** on pod mernoe gudenie nasekomych.

Oni ego počemu-to ne **kusali**...

„Vy jste ale egocentrik, Pahapile,“ **káráva**<sup>lfreq</sup> ho opatrně politruk Churijev.

Gustav se **kormoutil**, **žádal** o list papíru a pero a kostrbatými písmeny **smolil**:

„Včera tohoto roku jsem **požil** alkoholického nápoje. Načeš jsem **pošpynil** vojáckou čest. Napříště slibuju. Vojín Pahapil.“

Pak po krátké úvaze **pokaždé připojil**:

„Děkuju předem.“

Načeš **příšly** peníze od tětíčky Reet. Pahapil se v krámě **koupil** litr chartresky a **odkrácel** na hřbitov. Tam se v zelenavém přítmi **bělaly** kříže. Ještě dál, na břehu malého rybníčka, se **choulil** zanedbaný hrob a vedle něj překližkový obelisk. Pahapil ztěžka **dosedal** na hliněný kopeček, **pil** a **kouřil**.

„Estonci maj žít v Kanadě,“  **mumlal** si do monotónního bzukotu hmyzu.

Komáří si ho neznámo proč **nevšímal**... (Dov 30f. / 9)

### 2.4.4 Copular constructions und perfect meaning vs. state

- (115) **Neměl** jsem tehdy mnoho niterných smutků, naopak jsem **měl** značný smysl pro legraci, a přece nedá říci, že **bych** před radostnou tváří doby **uspěl** bez výhrad, protože mé legrace **byly** příliš nevážené [...]

U menja togda ne **bylo** osobych sokrovennych pečalej, naprotiv, ja **obladal** izrjadnym čuvstvom jumora, i vse-taki nel'zja skazat', čto radostnomu liku epochi ja **sootvetsvoval** bezogovoročno, ibo šutki moi **byli** sliškom neseřezny [...] (Kun 33 / 37)

(116) [...] **byl**<sup>I</sup> jsem cynický a křečovitě duchaplný s Markétou; a **když** jsem **byl**<sup>I</sup> sám (a **myslí**<sup>I</sup> na Markétu), **býval**<sup>Ifreq</sup> jsem bezradný a školácky rozechvěný.

[...] ja **byl**<sup>I</sup> ciničen i sudorožno ostroumen s Marketoj; a **ostavajas**<sup>IAp</sup> naedine s soboj (i **dumaja**<sup>IAp</sup> o Markete), **stanovilsja**<sup>I</sup> bespomoščnym i po-školjarski vzvolnovannym. (Kun 34 / 39)

(117) **Govoril**<sup>I</sup> skripučim, tonkim, kvakajuščim golosom i sredi drugih strannostej **imel**<sup>I</sup> takuju: **kogda** **govoril**<sup>I</sup> čto-libo vesko i uverenno, ukazatel'nyj palec pravoj ruki **prevraščal**<sup>I</sup> v krjučok i **ščuril**<sup>I</sup> glazki. A tak kak on **govoril**<sup>I</sup> **vsegda** uverenno, ibo érudicija v ego oblasti u nego **byla**<sup>I</sup> soveršenno fenomenal'naja, to krjučok **očen' často pojavljalsja**<sup>I</sup> pered glazami sobesednikov professora Persikova. A vne svoej oblasti, to est' zoologii, émbriologii, anatomii, botaniki i geografii, professor Persikov **počti ničego ne govoril**<sup>I</sup>.

**Mluvil**<sup>I</sup> tenkým skřehotavým hlasem a kromě jiných zvláštností **míval**<sup>Ifreq</sup> ve zvyku **mhouřit**<sup>I</sup> oči, **kdykoliv** mluvil důrazně a přesvědčivě, a ukazovák jeho pravé ruky se **proměnil**<sup>I</sup> ve skobu. Protože **vždycky hovořil**<sup>I</sup> přesvědčivě – **vyznačoval**<sup>I</sup> se totiž ve svém oboru fenomenální erudicí -, před jeho společníky se **přečasto vynořila**<sup>Ap</sup> skoba namísto ukazováku. Mimo svůj obor, tj. zoologii, embryologii, anatomii, botaniku a zeměpis, **skoro nikdy v hovoru nezabrousil**<sup>I</sup>. (RJ 385 / 5)

(118) Otkrytka iz doma **vyzyvala**<sup>I</sup> potrjasenie. Šmel', **zaletevšij**<sup>Part</sup> v barak, **proizvodil**<sup>I</sup> sensaciju. Perebranka s nadziratelem **vosprinimalis**<sup>I</sup> ' kak intelektual'nyj triumf.

Pohlednice z domova **bývala**<sup>Ifreq</sup> důvodem k zemětřesení. Čmelák, který **vletl**<sup>I</sup> do baráku, se **stával**<sup>I</sup> senzací. Hašteření s dozorci **bylo**<sup>I</sup> **vnímáno**<sup>Ap</sup> jako výraz jasně intelektuální převahy. (Dov 36 / 15)

(119) Panu Lojzovi **chyběly**<sup>I</sup> přední zuby a spodní ret **dovedl**<sup>I</sup> tak šikovně **přehrnout**<sup>Ap</sup> přes horní ret, že spodním pyskem si **olizoval**<sup>I</sup> špičku nosu.

U pana Lojzy ne **chvatalo**<sup>I</sup> předních zub, i on **umel**<sup>I</sup> tak lovko **zachvatyvat**<sup>I</sup> nižej guboj verchnjuju, čto ta **dostavala**<sup>I</sup> do končika nosa i **oblizovala**<sup>I</sup> ego. (MP 12)

## Habitual chains of events

(120) Největší děti v našem městečku **byli**<sup>I</sup> dospělí lidé, z těch dospělých ale **byli**<sup>I</sup> občané, kteří **hráli**<sup>I</sup> divadlo. Skoro všichni k nám **chodili**<sup>IInd</sup> do pivovaru, když **byla**<sup>I</sup> zabijačka, když **byl**<sup>I</sup> čas koroptví a zajíců, a hlavně když **byl**<sup>I</sup> čas hlavních zkoušek. **Každé dva měsíce** se **radovala**<sup>I</sup> naše společnost z nové hry, kterou nejdřív několik večerů **četli**<sup>I</sup> u nás v pokojích, **pili**<sup>I</sup> pivo a **mazali**<sup>I</sup> si chleby sádlem a **předčítali**<sup>I</sup> to, co se **bude**<sup>Fut</sup> **hrát**<sup>I</sup>. A pak si **zajeli**<sup>I</sup> do Prahy, jak tu hru **hrají**<sup>I</sup> v Praze. A pak **nastal**<sup>I</sup> ten nejkrásnější čas zkoušek. Matka jen **dala**<sup>Ap</sup> pít kozám a **nakrmila**<sup>Ap</sup> prasata, tak dávno před zkouškou si **oblékla**<sup>Ap</sup> kostým, modrý kostým, a **vzala**<sup>Ap</sup> pod paží svoji úlohu a **někdy** pěšky, **někdy** na bicyklu **vyjela**<sup>Ap</sup> do městečka. Ale to už **nebyla**<sup>I</sup> moje maminka, ale ta ženská, která **bude hrát**<sup>I</sup> v příštím představení. Když se **hrála**<sup>I</sup> Periferie, tak maminka **hovořila**<sup>I</sup> tak po pražsku a tak sprostě, že i tatínek se **šel**<sup>IIdet</sup> **podívat**<sup>Ap</sup> do úlohy, jestli to tam **je**<sup>I</sup>. Když ale **hrála**<sup>I</sup> Paní z námoří, tak se zase docela **vzdálila**<sup>I</sup> tak, že s tatínkem **mluvila**<sup>I</sup> docela podrážděně, a když **hrála**<sup>I</sup> Noru, tak nejdřív na otce **byla**<sup>I</sup> laskavá, skoro mu **dělala**<sup>I</sup> služku, ale potom, když Nora **změnila**<sup>Ap</sup> se i ve hře, tak maminka otci **hrozila**<sup>I</sup> rozvodem, **hrozila**<sup>I</sup>, že jej **opustí**<sup>I</sup>, a tatínek se **uklidnil**<sup>I</sup>, až se **přečetl**<sup>I</sup> v divadelní knížce, že to **je**<sup>I</sup> její úloha v posledním jednání, že to tak maminka **nemyslí**<sup>I</sup>.

Samymi bol'šimi det'mi v našem gorodke **byli** vzroslye, a sredi vzroslych **byli** takie, kotorye **razygryvali** predstavenija. Čut' li ne vse oni **chodili**<sup>ind</sup> k nam v pivovarnju: kogda **zabivali** svinej, kogda **byl** sezon ochoty na kuropatok i zajcev, a glavnoe, kogda **nastupala** pora general'nych repeticij. **Každye dva mesjaca** oni **radovali** nas novoj p'esoju, kotoruju vnačale neskol'ko večerov krjadu **čitali** u nas doma, pri étom oni **pili** pivo, **eli** tolstye lomti chleba, namazannye smal'cem, i **proiznosili** vsluch to, čto **sobiralis'** **ispolnjat'** na scene. Potom oni **ezdili** v Pragu – **posmotret'**, kak étu p'esu **stavjat'** tam. A potom **prichodila** prekrasnaja pora repeticij na scene. Matuška **poila** koz i **zadavala** korm porosjatam, pri étom ona uže zadolgo do repeticii **oblačalas'** v svoj sinij kostjum i, nakonec, **zažav**<sup>PAP</sup> rol' pod myškoj, **inogda** peškom, a **inogda** na velosipede **otpravljalas'** v gorod. No éto uže **byla** ne matuška, a dama, kotoraja **budet** **igrat'** v očerednom spektakle. Kogda **stavili** „Periferiju“, matuška **iz'jasnjalas'** s pražskim vygovorom i tak vul'garno, čto papaša daže **zagljadyval** v rol' – est' li tam takoe. Kogda že ona **igrala** ženščinu s morja, to nastol'ko **vchodila** v obraz, čto s papašej **razgovarivala** razdražennym tonom, a kogda Noru – to vnačale **byla** s nim obchoditel'na i gotova **uslužit'** emu vo vsem, no zatem, po mere togo kak charakter ee geroini **menjalsja**, **prinimalas'** **grozit'** emu razvodom i **tverdit'**, čto **brosit'** ego, i papaša **uspokaivalsja**, tol'ko **pročtja**<sup>PAP</sup> v knige, čto takova ee rol' v poslednem dejstvii, i **ponjav**<sup>PAP</sup>, čto na samom dele matuška ni o čem takom i ne **pomyšljaet'**. (Sext 145)

- (121) Ona **prichodila** ko mne **každyj den'**, a **ždat'** ee ja **načinal** s utra. Ožidanie éto **vyražalos'** v tom, čto ja **perestavjal** na stole predmety. Za desjat' minut ja **sadilsja** k okoncu i **načinal** **prislušivat'sja**, ne stuknet li vetchaja kalitka. I kak kur'ezno: do vstreči moej s neju v naš dvorik, malo kto **prichodil**, prosto skazat', **nikto ne prichodil**, a teper' mne **kazalos'**, čto ves' gorod ustremilsja v nego. [...] Ona **vchodila** v kalitku **odin raz**, a bienij serdca do togo ja **ispytyval** **ne menea desjati**. Ja ne ligu. **A potom**, kogda **prichodili** ee čas i strelka **pokazyvala** polden', ono daže i ne **perestavalo** stučat' do tech por, poka bez stuka, počti sovsem besšumno, ne **ravnjalis'** s oknom tufli s černymi zamševymi nakladykami-bantami, stjanutymi stal'nymi prjažkami.

**Inogda** ona **šalila** i, **zaderžavšis'**<sup>PAP</sup> u vtorogo okonca, **postukivala** noskom v steklo. Ja v tu že sekundu **okazyvalsja** u éтого okna, no **isčezala** tuflija, černyj šelk, zaslonavšij svet, **isčezal**, - ja **šel**<sup>idet</sup> ej **otkryvat'**.

Nikto ne **znal** o našej svjazi, za éto ja vam **ručajus'**, chotja tak nikogda i ne **byvaet'**. Ne **znal** ee muž, ne **znali** znakomye. V staren'kom osobnjačke, gde mne **prinadležal** étot podval, **znali**, konečno, **videli**, čto **prichodit'** ko mne kakaja-to ženščina, no imeni ee ne **znali**.

**Chodila**<sup>indet</sup> ke mně **denně** za poledne a já na ni **čekával**<sup>ifreq</sup> už od rána. Čekání **spočivalo** v tom, že jsem **přestavoval** na stole věci. Deset minut před tím, než **měla** **přijít**, jsem se **uchýlil** k oknu a napjatě **poslouchal**, kdy klapne omšelá branka. A kupodivu: než jsme se poznali, málokdo **zabloudil** na náš dvorek, prostě **nikdo nepřišel**, a ted' se mi **zdálo**, že se k nám hrne celé město. [...] Než **jedenkrát vešla**, **rozbušilo**<sup>PAA</sup> se mi **nejméně desetkrát** srdce, **nelžu** vám. **Vždycky** když se **přiblížila** hodina schůzky a ručička **ukazovala** poledne, **nepřestávalo** mi srdce tlouct jako na poplach až do chvíle, kdy se bez jediného klapnutí, téměř neslyšně **objevily** v okně střeвиčky s černými semišovými ozdobami v podobě mašlí, sepnutých kovovými přezkami.

**Někdy** se uličnický **zastavila** u sousedního okna a **poklepávala** špičkou na sklo. **Rozběhl** jsem se tam, ale mezitím **zmizel** střeвиček i černý hedvábný stín a já **šel**<sup>idet</sup> **otevřít**.

Nikdo **nevěděl** o našem vztahu, **jsem** si jistý, ačkoli se to **nestává**. Nic **netušil** ani její muž, ani známí. Ve staré vilce, kde jsem **bydlel** ve sklepním bytě, to samozřejmě

věděli, všimli<sup>p</sup> se, že ke mně **chodí<sup>ind</sup>** nějaká žena, ale **neznali** její jméno. (MM 135 / 112f.) (≈ 47)

### 3 General-factual contexts

#### 3.1 The non-resultative general-factual reading

(122) ... ale vždyť je to patnáct let, co jsem ji **naposledy viděl<sup>i</sup>**!

... no ved' prošlo pnatnadcat' let s tech por, kak ja v **poslednij raz videl<sup>i</sup>** ee! (Kun 14 / 17)

(123) No éto tak neobyknovenno, čto daže Stravinskij, genial'nyj psichiatr, vam, konečno, ne poveril. On **smotrel<sup>i</sup>** vas?

Přitom je to všecko tak podivné, že dokonce ani Stravinskij, geniální psychiatr, vám samozřejmě neuvěří. **Vyšetřoval<sup>i</sup>** vás? (MM 130 / 109)

#### 3.2 Resultative general-factual readings

(124) Taková výhrada **nemusila<sup>i</sup> být<sup>i</sup>** nebezpečná, protože **bylo<sup>i</sup>** dobrým zvykem psát i do nejlepšího kádrového posudku nějakou kritickou poznámku, někomu **vytknout<sup>p</sup>** „malý zájem o revoluční teorii“, jinému „chladný poměr k lidem“, jinému malou „bdělost a ostražitost“, někomu třeba „špatný poměr k ženám“, ovšem ve chvíli, kdy již **nebyla<sup>i</sup>** sama o sobě, kdy se k ní **přidala<sup>p</sup>** další výhrada anebo kdy se člověk **dostal<sup>p</sup>** do **nějakého** konfliktu nebo se **stal<sup>p</sup>** obětí podezření i útoku, **mohly<sup>i</sup>** se takové „pozůstatky individualismu“ anebo „špatný poměr k ženám“ **stát<sup>p</sup>** seménkem zkázy.

Takaja ogovorka **byla<sup>i</sup>** ne očen' opasnoj, ibo **sčitalos<sup>i</sup>** chorošim tonom vnosit' i v samuju bezuprečnuju charakteristiku inoe kritičeskoe zamečanie; odnogo **popreknut<sup>p</sup>** „vjalym interesom k revoljucionnoj teorii“, drugogo – „cholodnym otnošeniem k ljudjam“, tret'ego – nerazvitoj „bditel'nost'ju i nastorožennost'ju“, a ešče kogo-to, dopustim, „plochim otnošeniem k ženščine“; konečno, esli k odnoj ogovorke **dobavljalas<sup>i</sup>** ešče i drugaja, esli čelovek **okazyvalsja<sup>i</sup>** zamešannym v **kakom-libo** konflikte ili **stanovilsja<sup>i</sup>** žertvoj podozrenij i napadok, takie „ostatki individualizma“ ili že „plochoe otnošenje k ženščine“ **mogli<sup>i</sup> stat<sup>p</sup>** semenami gibeli. (Kun 33 / 37f.)

(125) Ona **vchodila<sup>i</sup>** v kalutke **odin raz**, a bienij serdca do toho ja **ispytyval<sup>i</sup>** ne menee **desjati**. Ja ne lgu.

Než **jedenkrát vešla<sup>p</sup>**, **rozbušilo<sup>p</sup>** se mi **nejméně desetkrát** srdce, nelžu vám. (MM 135 / 112f.) (≈ 121)

(126) Étot pidžak Kal'ju **nadeval<sup>i</sup> tol'ko raz** – v magazine Lansmana.

Tohle sakosi Pahapil zatím **oblékl<sup>p</sup> jen jednou v životě**, totiž v Lansmanově obchodě, **když ho kupoval<sup>i</sup>**. (Dov 29 / 8)

Not sure this is an adequate translation:

(127) V étom mire **ubivali<sup>i</sup>** za pačku čaja.

V tomto světě se **zabíjelo<sup>i</sup>** pro balíček čaje. (Dov 35f. / 14) (= 106)

Not clear what motivates the aspect choice in these examples:

- (128) Když se to tak vezme, **souhlasil**<sup>i</sup> jsem vlastně se **vším**, co Markéta **tvrdila**<sup>i</sup>, i v brzkou revoluci v západní Evropě jsem **věřil**<sup>i</sup>, jen s jedním jsem **nesouhlasil**<sup>i</sup>: [...]

V konečnom sčete ja **soglašalsja**<sup>i</sup> se **vsem**, čo **utverždala**<sup>i</sup> Marketa, **veril**<sup>i</sup> daže v blizkujú revoluciju v Zapadnoj Evrope; liš' s odnim **ne mog**<sup>i</sup> **soglasit'sja**<sup>p</sup>: [...] (Kun 36 / 41)

- (129) Esli ja ne **ponimal**<sup>i</sup> smysla **kakoj-nibud'** zametki v gazete, Aloizij **ob"jasnjal**<sup>i</sup> mne ee bukvál'no v odnu minutu [...]

**Kdykoli** jsem **nerozuměl**<sup>i</sup> **některé** poznámce v novinách, v minutě mi ji **vysvětlil**<sup>p</sup> [...] (MM 139 / 116)

IPF in both, but possibly different motivation:

- (130) - Ja **zabyl**<sup>p</sup> ego [roman], - **otvetil**<sup>p</sup> Persikov, - **pomnju**<sup>i</sup>, **čítal**<sup>i</sup>, no **zabyl**<sup>pPrät</sup>.

„Zapomněl<sup>p</sup> jsem už, o čem to bylo<sup>i</sup>,“ **odpověděl**<sup>p</sup> Persikov, „**pamatuji**<sup>i</sup> se, že jsem ho **četl**<sup>iPrät</sup>, ale **nevzpomínám**<sup>iPräs</sup> si už na obsah.“ (RJ 396 / 20)

- (131) To, čo **kazalos'**<sup>i</sup> važnym, **otošlo**<sup>p</sup> na zadnij plan.

To, co se **zdálo**<sup>i</sup> důležité, **ustoupilo**<sup>p</sup> do pozadí. (Dov 36 / 15) (≈ 58)

Presuppositional IPF:

- (132) **Ptali**<sup>i</sup> se mne, jestli jsem si s ní **dopisoval**<sup>i</sup>. **Řekl**<sup>p</sup> jsem, že ano. **Ptali**<sup>i</sup> se mne, jestli si nepamatuju, **co** jsem jí **psal**<sup>i</sup>. **Řekl**<sup>p</sup> jsem, že si to nepamatuju [...] A **co** ti **psala**<sup>i</sup> Markéta? **Pokrčil**<sup>p</sup> jsem rameny, abych vzbudil dojem, že mi **psala**<sup>i</sup> o intimních věcech, o nichž tu nemohu hovořit. **Nepsala**<sup>i</sup> ti **něco o školení**? **ptali**<sup>i</sup> se. Ano, **psala**<sup>i</sup>, **řekl**<sup>p</sup> jsem. **Co** ti **o tom psala**<sup>i</sup>? [...] **Psala**<sup>i</sup> ti, **že** vládne na školení zdravý duch? Ano, **řekl**<sup>p</sup> jsem, snad **něco takového psala**<sup>i</sup>. **Psala**<sup>i</sup> ti, **že** poznává, co je to síla optimismu?

Oni **sprosilil**<sup>p</sup>, **perepisyvalsja**<sup>i</sup> li ja s nej. Ja **otvetil**<sup>p</sup>, **perepisyvalsja**<sup>i</sup>. Oni **sprosilil**<sup>p</sup>, ne pomnju li ja, **čo psal**<sup>i</sup> ej. Ja **skazal**<sup>p</sup>, ne pomnju [...] A **čo** tebe **psala**<sup>i</sup> Marketa? Ja **požal**<sup>p</sup> plečami, daby sozdat' vpečatlenie, čo **psala**<sup>i</sup> ona ob intimnych veščach, o kotorych govorit' ne mogu. Ona **psala**<sup>i</sup> tebe **čo-nibud' o politzanajtijach**? – **sprosilil**<sup>p</sup>. Da, **psala**<sup>i</sup>, **skazal**<sup>i</sup> ja. **Čto** že ona tebe **psala**<sup>i</sup>? [...] Ona **psala**<sup>i</sup> tebe, **čo** na politzanajatijach carit zdorovyj duch? Da, **skazal**<sup>p</sup> ja, požaluj **psala**<sup>i</sup> **čo-to vrode togo**. A možet, **psala**<sup>i</sup> tebe, **čo** postepenno uznaet, čo takoe sila optimizma? (Kun 38 / 44) (≈ 5)

- (133) - A vam, čo že, moi stichi ne nravjatsa? – s ljubopytstvom **sprosil**<sup>p</sup> Ivan.

- Užasno ne nravjatsja.

- A vy **kakie čítali**<sup>i</sup>?

- Nikakich ja vašich stichov ne **čítal**<sup>i</sup>. – nervno **voskliknul**<sup>p</sup> posetitel'. [...] – kak budto ja drugih ne **čítal**<sup>i</sup>?

„Copak, nelibí se vám moje verše?“

„Ani trochu.“

„A **které** jste **četli**<sup>i</sup>?“

„Žadné jsem **nečetl**<sup>i</sup>!“ **zvolal**<sup>p</sup> podrážděně návštěvník. [...] „Jako bych **nečetl**<sup>i</sup> verše jiných! [...]“ (MM 127 / 107)

- (134) Už ne znaju, **gde** ee **prjatali**<sup>i</sup> moi blagodetel'nicy.



Však také nevím, **kde** přesně ho mé dobrodinkyně **ukrývaly**! (Dov 28 / 7)

Two more examples:

(135) [...] text, který jsem **psal** během pěti hodin v nepravidelných pauzách [...]

[...] tekst, kotoryj ja **napisal** za pjat' časov vo vremja slučajnych pereryvov [...] (RP 182)

(136) - no tot, skol'ko ja o nem **slyšal**, vse-taki choť čto-to **čítal**! [...]

„ale váš přítel, pokud jsem o něm **slyšel**, přece jen něco **přečetl**!“ (MM 130 / 108)

## 4 Additional examples (Appendix in Gehrke 2002)

### 4.1 Adverbial participles

- I **vyšel**, **zadev**<sup>PAP</sup> Alichanova plečom. Za nim **potjanulis**<sup>P</sup> ostal'nye.  
Alichanova **ve dverích lehce odstrčil** ramenem. Za ním **proudili** ostatní. (Dov 49 / 29)
- Elektromonter **položil** golovu na kleenku, vidimo soveršenno **obessilev**<sup>PAP</sup>.  
Elektrikář viditelně **ztrácel** poslední zbytky sil a hlava mu bezvládně **klesla** na voskované plátno na stole. (Dov 51 / 31)
- Alichanov **šagnul**, **naklonilsja**, **sodrogajas**<sup>IAP</sup> ot zapacha mokrych trjapok, vodki i los'ona.  
- Vse normal'no, - **skazal** on.  
Ogromnaja jantarnaja broška **carapala** emu lico.  
- Ach ty, svoloč'! – poslednee, čto **uslyšal** nadziratel'...  
On **sidel** v kanceljarii, **ne zažigaja**<sup>IAP</sup> lampy. Potom **vyprjaminsja**, **uroniv**<sup>PAP</sup> ruki. Zvjaknuli pugovicy na manžetach.  
Alichanov **přikročil** až k ní, **sklonil** se a **otřásl** se ze směsice pachů vodky, parfému a mokrých hadrů.  
„To bude v pořádku,“ **řekl**.  
Do tváře se mu **zaryla** obrovská jantarová brož.  
„Ty hajzle jeden zasraná!...“ bylo poslední, co dozorce **slyšel**.  
**Seděl** v kanceláři, ale lampu **nechal** zhasnutou. Pak se náhle **napřimil** a ruce mu bezvládně **klesly**. O stůl **cinkly** kovové knoflíky na manžetách. (Dov 52 / 32)
- Souhlasil a **litoval**, že má bohužel čas sotva něco přes hodinu [...]  
On **soglasilsja**, **vyrazil** **sožalenie**, čto raspologaet liš' nemnogim bolee časa [...] (Kun 9 / 11)
- „Z hrozně dávných dob,“ **odpověděl** jsem a **nešel** jsem ani **k večeri**, **šel** jsem ven z hotelu (**stmívalo** se už), **šel** jsem se ještě **toulat**.  
- S beskonečno davnich vremen, - **otvetil** ja i, tak i ne **použinav**<sup>PAP</sup>, **vyšel** iz gostinicy (uže **smerkalo**<sup>I</sup>): **chotelos**<sup>I</sup> ešče **pobrodit**<sup>PAA</sup>. (Kun 15 / 19)
- Ja **šel**<sup>idet</sup> s neju rjadom, **starajas**<sup>IAP</sup> **idti**<sup>idet</sup> v nogu, i, k udivleniju moemu, soveršenno ne **čuvstvoval** sebja stesnennym.  
- Net, ja ljublju cvety, tol'ko ne takie, - **skazal** ja.  
- A kakie?

- Ja rozy ljublju.

Tut ja **požalel** o tom, čto èto **skazal**, potomu čto ona vinovato **ulybnulas** i **brosila** svoi cvety v kanavu. **Rasterjavšis** nemnogo, ja vse-taki **podnjal** ich i **podal** ej, no ona, **usmechnuvšis**, **ottolknula** cvety, i ja **pones** ich v rukach.

**Připojil** jsem se k ní a **snažil** jsem se **jít** stejným krokem. K mému velkému překvapení jsem se **necítil** ani trochu stísněně.

„Mám rád květiny, jenomže takovéhle ne,“ **vysvětloval** jsem.

„A jaké?“

„Zbožňuju růže.“

Hned jsem **litoval** svých slov, protože se provinile **usmála** a **odhodila** květy do škarpy. Poněkud **rozpacitě** jsem je **zvedl** a **podal** neznámné, ale ona **s úsměvem** odmítla, a tak jsem **nesl** kytici já. (MM 134 / 112)

- Persikov živo **spolz** s tabureta, **brosiv** kremal'eru na poldoroge i, medlenno **vertja** v rukach papirosu, **prošel** v kabinet assistenta.

Persikov spěšně **sklouzl** ze stoličky, **zanechal** mikroskop nezaostřený a **zamířil** do asistentovy pracovny – **přitom** pozvolna **otáčel** v prstech cigaretou. (RJ 389 / 10)

- Professor s prezreniem **tknul** levuju kalošu, ktoraja **razdražala** ego, ne **želaja** **nalezat** na pravuju, i **pošiel** k vychodu v odnoj kaloše. Tut že on **poterjal** nosovoj platok i **vyšel**, **chlopnuv** tjaželoju dver'ju. Na kryl'ce on **dolgo iskal** v karmanach spički, **chlopaja** sebja po bokam, **našel** i **tronulsja** po ulice s nezažžennoj papirosoj v rtu. Ni odnogo čeloveka učenyj ne **vstretil** do samogo chrama. Tam professor, **zadrav** golovu, **prikovalsja** k zolotomu šlemu. Solnce sladostno **lizalo** ego s odnoj storony.

Pohrdavě **odkopl** levou galoši, která ho **dráždila** a **odmítala** se **nazout** přes pravou, a **zamířil** k východu v jedné galoši; cestou **vytrousil** kapesník. **Vyšel** ven a **práskl** těžkými dveřmi. Předě dveřmi **dlouho hledal** zápalky, **plácal** se po kapsách, a když je konečně **nahmatal**, **vykročil** po ulici s nezapálenou cigaretou v ústech. Až ke kostelu **nepotkal** človíčka. Tady **zaklonil** hlavu a **přikoval** se pohledem k zlaté přílbě. Slunce mu labužnický **olizovalo** tvář. (RJ 392 / 14)

#### 4.1.1 Iterative/habitual contexts (boldface marks explicit marking of repetitive context)

- A pak při hodině náboženství, **pokaždé nejmín čtyřikrát**, se **ozval** křik některého z žáků, shora **přiletěl** hrozný pohlavek, který **srazil** hrajícího se žáka na lavici, **pokaždé** ale pan děkan **chodil** **dál**, ale nikomu, z žáků se nic **nestalo**, protože **měl** na sobě košili od firmy Milan Hendrych, Palackého ulice 156. Pan děkan vůbec **býval** **často** tak zasněný. V létě se **odstěhoval** z fary do hradební věže, do kaplanky, která **byla** v té věži docela až v posledním patře. **Muselo** se tam po schodech, a když se **otevřely** dveře do kaplanky, tak tam **byl** veliký pokoj, trámy docela zčernalé, a malá tři okna svítila ve dnetak jasně, až **přecházely** v tom přitímí oči. Tady pan děkan **býval** na letním bytě, tady **měl** postel a stůl a židle, pod okny lavice. Tady **jednou za rok pozval** žáky náboženství, **aby** mu **vydrhl** schody, **umyl** podlahu. A **pokaždé** nás **nechal** samotné, **protože věděl**, že všichni **víme** ze školy, **kdybychom dělali** něco, co se **nemá**, že shůry **by přiletěla** ohromná facka, takový úder shora, který **by** každého **srazil** na podlahu nebo ze schodů, ale nikomu by se nic **nestalo**, protože každý žák **měl** na sobě košili od firmy Milan Hendrych, Palackého ulice číslo 156.

Vot tak vo vremja urokov katechizisa, **na každom samoe men'šee četyre raza**, **razdavaľsja** vopl' kogo-to iz nas, komu gospodin nastojatel' **vlepljal** uvesistuju zatreščinu, ktoraja **povergala** balovnika na skam'ju, no nastojatel' **prodolžal** **prochaživat'sja**, i ni

s kem iz učeníkov ne **slučalos**<sup>i</sup> ničého plochogo, potomu čto vse my **nosili** soročki ot Milana Gendricha, ulica Palackogo, 156.

Gospodin nastojatel' voobšče **často prebyval** v mečtatel'nom nastroenii. Naprimer, letom on **pereseljalsja** iz domika pri cerkvi v komnatu na samom verchnom étaže uglivoj bašni. Tuda emu **prichodilos**<sup>i</sup> **vzbirat'sja** polestnice, i **za dverjami**, vedšimi v ego obitališče, **bylo** bol'soe pomeščenje s počernevšimi balkami i tremja malen'kimi okoškami, kotorye **propuskali** dnem stol'ko sveta, čto v polumrake daže stanovilos' bol'no glazam. Zdes' u gospodina nastojatelja **byla** letnjaja kvartira s krovat'ju, stolom i stol'jami i skam'jami pod oknom. I **raz v god** on **priglašal** sjuda svoich učeníkov, **čto**by oni **otdraili** emu lestnicu i **vymyli** pol. I **vsjakij raz** on **ostavljaj** nas odnich, **znaja**<sup>iAP</sup>, čto vse my **pomnim** po škole: **esli** my **budem delat'**<sup>iFut</sup> nečto nepodobajušče, to sverchu na na **obrušitsja**<sup>pPrás</sup> strašnaja zatreščina, takoj udar, kotoryj **schvyrnet**<sup>pPrás</sup> ljubogo iz nas na pol ili **sbrosit**<sup>pPrás</sup> so stupenej, odnako že ničého plochogo ni s kem ne **slučalos**<sup>i</sup>, potomu čto každyj učeník **byl** **oblačen**<sup>(p)</sup> v soročku iz magazina Milana Genricha, ulica Palackogo, 156. (JR 107f.)

- A když jsme **byli**<sup>(l)</sup> docela **předsvědčení**<sup>p</sup>, že pan děkan **sedí** na Knížecí a **pije** vermut a dívají jsme se okny dolů na střechy městečka, druhým oknem na řeku, třetím oknem dolů do děkanská zahrady a na lavičky v křoví u plotu, tak **najednou** se **zjevil**<sup>p</sup> uprostřed nás pan děkan, tlustý a silácký, **stál** uprostřed nás, **přitáhl**<sup>p</sup> křeslo k oknu, **posadil**<sup>p</sup> se a **díval** se oknem na řeku, vrcholky stromů se **kymáčely** ve slunci, a pan děkan **pravil**... Tak chlapci, **můžete** už **jít**<sup>idet</sup>, kbelíky **postavte**<sup>p</sup> u fary. To **řekl**<sup>p</sup>, a už na nás **zapomenul**<sup>p</sup>, **díval** se na tekoucí řeku, na stromy ta na druhé straně vody, **díval** se a **býl** krásný. **Seběhli**<sup>p</sup> jsme po schodech o tři patra níž, a na dvoře fary jsme se **krčili**<sup>p</sup>, protože **pořád** jsme **každý měl** **dojem**, že **najednou** někdo z nás **začne** **křičet** a **držet** si hlavu a někomu **poteče**? z nosu krev mocnou ranou nějaké veliké tlapy, která **přiletí** a **srazí** nás shora na zem.

Kogda že my **byli**<sup>(l)</sup> soveršenno **uvereny**<sup>(p)</sup>, čto gospodin nastojatel' **sidiť** „Na Knažeskoj“, **potjagivaja**<sup>iAP</sup> vermut, i **smotrel**<sup>i</sup> čerez okno vniz, na sad so skamejkami v kustach vdol' zabora, on **vnezapno javljalsja** pered nami, tolstyji mogučij; **stoja**<sup>iAP</sup> sredi nas, on **velel**<sup>(vP)</sup> **perenesti** ego kreslo k oknu, zatem **sadilsja** i **smotrel** čerez okno na reku, verchuški derev'ev **pokačivalis**<sup>i</sup> v lučach solnca, a gospodin nastojatel' **govoril**: „Ladno, rebjata, **chvatit**<sup>p</sup>, vedra **ostavite**<sup>p</sup> voze doma“. **Skazav**<sup>pAP</sup> éto, on tut že o nas **zabyval** i **prinimalsja smotret'** na strujaščuju svoi vody reku s derev'jami na drugom beregu – i **vygljadel** krásivym. My **sbegali** po stupenjam s četvertogo étaža i vo dvore vse ešče **poeživalis**<sup>i</sup>, potomu čto **nam kazalos**<sup>i</sup>, budto vot-vot kto-nibud' iz nas **zakričit**<sup>pAA</sup> ili **schvatitsja**<sup>p</sup> za golovu ili u kogo-nibud' **potečet**<sup>p</sup> iz nosa krov' ot sil'nogo udara desnicy, kotoraja **obrušitsja** sverchu i **povalit**<sup>p</sup> nas nazem'. (JR 108f.)

- **Viděl** jsem taky pana děkana, když se **svázela** žita, jak **si sundal**<sup>p</sup> listrový kabát, tam v polích za pivovarem, **vzal**<sup>p</sup> vidle a **nakládal** dva snopy **najednou**, nikdo mu **nestačil**<sup>p</sup> **odbírat** snopy. **Nejraději nakládal** žita na polích Šafaříkových slečen, tam hospodáře **dělala** nejstarší dcera, která **vypadala** jako přestrojený chlap, **chodila** v hlínkách a **kouřila** a **dovedla**<sup>p</sup> **vodit**<sup>lind</sup> koně jako opravdový koči. [...] Tak pan děkan jim **naložil** všechna žita, všechno obilí. Pak docela zpočený, s kabátem pod paží se **vracel** podle řeky nazpátek do městečka.

Ešče ja **videl**, kak **vo vremja uborki ržanych snopov** v poljach za pivovarnej gospodin nastojatel', **snjav**<sup>pAP</sup> svoe ljustrinovoe pal'to, **bral** v ruki vily i **kidal** na voz srazu po dve kopny, da tak bystro, čto u nego ich ne **uspevali** **prinimat'**. Bol'se vsego on **ljubil** **gruzit'** snopy na pole baryšen' Šafaržíkovych, tam za chozjaina **byla** staršaja sestra, kotoraja **vygljadela**<sup>p</sup> kak pereodetyj mužčina, ona **nosila** sapogi i **kurila**, a s loščad'mi **obchodilas**<sup>i</sup> ne chuže zapravskogo kučera. [...] Tak vot, gospodin nastojatel' **ubiral** u nich vsju rož, vse chleba, a potom, naskvoz' mokryj ot pota, **zažav**<sup>pAP</sup> svernutoe pal'to pod myškoj, **vozvraščalsja** beregom reki nazad v gorod. (JR 110)

- Tady, kde **končil** oblouk mostu, tady **bylo** **vždycky** ticho, sem nikdo sám od sebe **neše**<sup>idet</sup>, a když, tak aby **udělal**<sup>p</sup> malou nebo velkou potřebu. Tady jsem **měl** skryš za viklavým

kamenem, kde jsem **měl** inkoust a pero. Když ve škole jsem **neměl** napsaný úkol a pan řídící učitel se mě **ptal**, tak jsem **řekl**, že jsem si **zapomenul** sešit doma. A pan učitel mne **poslal** domů pro ten úkol, abych **získal** čas, **koupil** jsem si v papírnictví sešit a tady pod mostem, v suchu a tichu, jsem na kolenou **napsal** úkol.

Zdeš', pod proletem mosta, **vsegda bylo** ticho, sjuda redko kto **zagljadyval**, razve čto **spravit** maluju ili bol'suju nuždu. Zdeš', pod šatkim kamnem, u menja **byl** tajnik, gde ja **chranil** černila i ručku. Esli ja **prichodil** v školu s nesdelannym urokom, a učitel' **sprašival** počemu, to ja **otvečal**, čto **zabyl** tetrad' doma. I učitel' **otpravljajal** menja domoj, a ja, čtoby ne **terjat** vremeni, **pokupal** v pisčebumažnom magazine tetradku i tut, v tišine i pokoe, **delal** na kolenjach domašnee zadanie. (MP 12)

- Je' ze šesti dětí, a jeho tatínek **měl** tak velikou sílu, že mu děti **dávaly** na stůl ořech, tatínek **zvedl** prs a lu ho! prstem **louskal** ořechy líp než louskáčkem! Ale pan děkan, když **byl** dítě a potom kluk, tak **byl** z těch šesti dětí tak slabej, že se **nehodil** pro práci v lese, a tak rodiče si **řekli**, co s ním? A **dali** ho **študovat** na faráře. K večeri **mívali** velikánskou mísu brambor, rodina **seděla** kolem stolu, lžíce připravený, a **najednou** maminka **cvakla** a lžící a všech osm lžící **dlabalo** o závod z tý mísy tak rychle a dlouho, až **nezbyl** ani jediný brambor.

On odin iz šesti detej, i ego otec **byl** takim sil'nym, čto, kogda synov'ja **klali** na stol orech, on – **raz** pal'cem! – **raskalyval** ego lučše, čem ščipsy dlja orechov. No gospodin nastojatel' v mladenčestve, da i v detstve **byl** samym slabym iz vsech šesterych i ne **godilsja** dlja raboty v lesu, tak čto roditeli vse **sprašivali** drug druga – čto že nam s nim **delat**? I **otdali** ego **učit'sja** na svjaščennika. Na užin u nich **byvala** ogromnaja miska kartoški, vsja semja **sadilis'** vokrug stola s ložkami nagotove, a potom matuška **chlopala** ložkoj, i vse vosem' ložek bystro i napereboj **nyrjali** v misku – do tech por, poka iz nee ne **isčezala** poslednjaja kartofelina. (MP 13f.)

- Když pak **bylo** týden před hlavním představením, když už se společnost **naučila** zpaměti svoje úlohy, tak ten poslední týden herci **chodili** místo na náměstí rovnou do divadla. Tři hodiny před generálními zkouškami **si oblékli** kostýmy a ty šaty, ve kterých **budou hrát**, a aby se **naučili chodit** v kostýmech, tak náměstím do hotelu Na Knížecí **prošel** v dlouhé suknici Othello, pan lékárník, **držel** si stříbrnou suknici, aby se **nesvalil**, už **byl** načerněný, se širokým zlatým pásem, **přecházel** náměstím sem a tam, pak zase **vešel** do hotelu a **poručil** si sklenku na posilnění.

Kogda že do prem'ery **ostavalas'** tol'ko nedelja, kogda aktery uže **znali** svoi roli naizust', oni ne **chodili** bol'se na ploščad', a **otpravljalis'** prjamikom v teatr. Za tri časa do general'noj repeticii oni **nadevali** te kostjupy i plat'ja, v kotorych **dolžny byli igrat**, čtoby **naučit'sja** v nich **dvigat'sja**, i vot čerez ploščad' v gostinicu „Na Knjažeskoj“ **šel** v dlinnopoloj chlamide Otello – gospodin aptekar', on **prideržival** étu serebristuju chlamidu rukoj, čtoby ne **upast**, lico u nego uže **bylo** černoje, i na talii sverkal zolotoj pojas, on **brodil** tuda-sjuda po ploščadi, a potom **zachodil** v gostinicu i **propuskal** rjumočku dlja ukreplenija nervov. (Sext 147)

- A v té dlouhé róbě **přijela** do městečka, schvalně **nejela** rovnou do divadla, ale **seskočila** a **opřela** kolo trafikou a zase si **držela** róbu, aby se o ni **nesvalila**, **neklopýtla**, **prošla** večerním korzem, **divila** se, že **nemůže** najít Othella [...]

I v étom dlinnom narjade ona **priežžala** v gorod, ona naročno ne **echala** prjamo v teatr, a **ostavljala** velosiped u gazetnogo kioska i, **priderživaja** podol, čtoby ne **spotknut'sja** i ne **upast**, **šestvovala** po večernej glavnoj ulice, **udivljajas'**, čto ne **možet** najti aptekarja Otello [...] (Sext 147)

- A matka, když to doma **viděla**, tak se celá **prolomila**, **zhroutila** se, a z kuchyně se pomalu **odplížila** na chodbu a ze schodu na schod **vyšla** na pivovarský dvůr, **opírala** se o zed' a lidé z pivovaru si **mysleli**, že maminka **dostala** housera, ale matka zase docela zlomená **vešla** do pokoje, ke kolečkové židli, tatínek ji **přistavil**, a když se matka **posadila** do toho křesla a

zakryla<sup>P</sup> si nohy kostkovanou dekou, otec se opět zaradoval<sup>PAA</sup>, vozil<sup>lind</sup> matku z pokoje do pokoje a matka říkala<sup>I</sup>, že takhle bude jezdit<sup>lind</sup> až do konce svého života.

I u matuški, kogda ona voobražala<sup>I</sup> etu scenu u nas doma, podkašivalis<sup>I</sup> nogi, ona valilas<sup>I</sup> na pol i medlenno vypolzala<sup>I</sup> iz kuhni v koridor, a potom – stupen'ka za stupen'koj – vybiralas<sup>I</sup> vo dvor pivovarni, gde stojala<sup>I</sup>, opirajas<sup>IAP</sup> o stenu, tak čto pivovary dumali<sup>I</sup>, čto u nee prostrel<sup>P</sup>, a matuška, soveršenno slomlennaja, vozvraščalas<sup>I</sup> v komnatu, k svoemu kreslu-katalke, kotoroe ej pododvigal<sup>I</sup> papaša, i kogda matuška usaživalas<sup>I</sup> v nego, zakutav<sup>PAP</sup> nogi kletčatym pledom, otec snova radovalsja<sup>I</sup> i vozil<sup>lind</sup> ee po kvartire, matuška že govorila<sup>I</sup>, čto takoj ona i ostanetsja<sup>P</sup> do konca žizni. (Sext 148f.)

- A tak když jsem kračel<sup>I</sup> korzem a když jsem šel<sup>det</sup> ze školy a do školy, tak jsem se pořád styděl<sup>I</sup> právě proto, že jsem nemohl<sup>I</sup> nikdy v našem městečku být<sup>I</sup> sám, lidé mne sami od sebe zdravili<sup>I</sup>, přátelsky na mne mávali<sup>I</sup>, a já jsem je neznal<sup>I</sup>, a když, tak pouze z ulice.

Poětomu, guljaja<sup>IAP</sup> po glavnoj ulice, ili napravljajas<sup>IAP</sup> v školu, ili vozvraščajas<sup>IAP</sup> domoj, ja vsegda smuščalsja<sup>I</sup> ottogo, čto nigde v našem gorodke mne ne udavalos<sup>I</sup> ostat'sja<sup>P</sup> v odinočestve: ljudi pervymi zdorovalis<sup>I</sup> so mnoj, družeski machali<sup>I</sup> rukoj, chotja ja vovse ich ne znal<sup>I</sup>, razve čto vstrečali<sup>I</sup> na ulicach. (Sext 149)

- Ale ta společnost divadelního spolku hrála<sup>I</sup> divadlo sama o sobě, i když se příběhy staly<sup>P</sup> jinak a jinde a v jinačí čas. Tuhle zimu se začala<sup>P</sup> zkoušet<sup>I</sup> Sextánka. Do pivovaru na čtené zkoušky přišly<sup>P</sup> i manželky pánů, kteří k nám chodili<sup>lind</sup> na zabijačky a koroptve a krajíce mazané sádlem, a já jsem seděl<sup>I</sup> v kuchyni a docela jsem nemohl<sup>I</sup> chodit<sup>lind</sup> z toho, co jsem slyšel<sup>I</sup> a viděl<sup>I</sup>.

Voobšče-to členy tetral'nogo kružka igrali<sup>I</sup> spektakli o samich sebe, chotja p'esy byli<sup>I</sup>, razumeetsja, vovse ne o nich i dejstvie nich razvoračivalos<sup>I</sup> v drugoe vremja i v drugom meste. Toj zimoj načali<sup>P</sup> repetirovat<sup>I</sup> „Šestiklassnicu“. V pivovarnuju na čitki prichodili<sup>I</sup> ženy tech, kto byval<sup>ifreq</sup> u nas na mjasnych pirach i el kuropatok i lomti chleba so smal'cem, i ja sidel<sup>I</sup> v kuchne, ne v silach sdivinut'sja<sup>P</sup> s mesta ot togo, čto videl<sup>I</sup> i slyšal<sup>I</sup>. (Sext 149)

- Živoj otec mog<sup>I</sup> proizvesti<sup>P</sup> vpečatlenie buržuaznogo izlišestva. Ja že ubival<sup>I</sup> dvouh zajcev. (Daže ne znaju, možno li sčitat' takoe vyraženie uspešnym.) To est' ispol'zoval<sup>I</sup> vse preimuščestva ljubimogo syna. Izbegaja<sup>IAP</sup> pri etom reputacii blagopolučnogo mal'čika. [...] U menja byli<sup>I</sup> normal'nye rjadovyje sposobnosti. Zaurjadnaja vnešnost' s čutočku fal'sivym neapolitanskim ottenkom. Zaurjadnye perspektivy. Vse predveščalo<sup>I</sup> obyčnuju sovětskuju biografiju.

Žijící otec mohl<sup>I</sup> působit<sup>P</sup> dojmen buržoazního přežitku. A já tak zabil<sup>P</sup> dvě mouchy jednou ranou. (I když si nejsem zcela jist, zda tato formulace nezní nevyhodně.) Ale myslím to tak, že jsem využíval<sup>P</sup> všech výhod plynoucích z postavení milovaného syna. A přitom se vyhnul<sup>P</sup> pověsti mazánka.

[...] Mé schopnosti a vloby nebyly<sup>I</sup> nijak mimořádné, zevnějšek pak všední, s nepatrně faleným neapolským odstínem. Z čehož také plynul<sup>P</sup> všední perspektivy. Vše věštilo<sup>I</sup> běžný sovětský životopis. (Dov 34 / 13)

- Balodis služil<sup>P</sup> povarom. Glavnoj ego zabotoj byla<sup>I</sup> prodovol'stvennaja kladovaja. Tam chranilis<sup>I</sup> salo, džem, muka. Ključí Balodis celyj den' nosil<sup>I</sup> v rukach. Zasypaja<sup>IAP</sup>, privjazoval<sup>I</sup> ich špagatom k svoemu detorodnomu organu. Ěto ne pomogalo<sup>P</sup>. Nočnaja smena dvaždy otvjazyvala<sup>I</sup> ključí i vorovala<sup>I</sup> produkty. Daže muka byla<sup>I</sup> s'edena<sup>(p)Part...</sup>

Balodis v lágru pracoval<sup>I</sup> jako kuchař. Jeho hlavní každodenní starostí byl<sup>I</sup> sklad potravin. Tam měl<sup>I</sup> uložen<sup>pPart</sup> veškerý proviant včetně špeku, džemu a mouky. Klíče od skladu Balodis po celý den nedal<sup>P</sup> z ruky. Než šel<sup>det</sup> spát<sup>P</sup>, přivazoval<sup>I</sup> si je provázkem k přirození. Nepomáhalo<sup>I</sup> to. Noční směně se dvakrát podařilo<sup>P</sup> klíče odvázat<sup>P</sup> a potraviny si nakrást<sup>P</sup>. Dokonce i mouku sežrali<sup>P</sup>... (Dov 49f. / 29)

- Ivan uznal iz rasskaza gostja, kak **provodili** den' vozljublennye. Ona **prichodila**, i pervym dolgom **nadevala** fartuk, i v uzkoj perednej, gde **nachodilas'** ta samaja rakovina, kotoryj **gordilsja** počemu-to bednyj bol'noj, na derevjannom stole **zažigala** kerosinku, i **gotovila** zavtrak, i **nakryvala** ego v pervoj komnate na oval'nom stole. Kogda **šli**<sup>idet</sup> majskie grozy i mimo podslepovatyh okon šumno **katilas'** v podvorotnju voda, **ugrožaja**<sup>AP</sup> **zalit'** poslednij prijut, vljublennye **rastaplivali** pečku i **pekli** v nej kartofel'. Ot kartofelja **valil** par, černaja kartofel'naja šelucha **pačkala** pal'cy. V podval'čike **slyšalsja** smeč, derev'ja v sadu **sbrasyvali** s sebja posle doždja oblomannye vetočki, belye kisti. Kogda **končili**<sup>P</sup> grozy i **prišlo** dušnoe leto, v vaze **pojavis'** dolgoždannye i oboimi ljubimye rozy. Tot, kto **nazyval** sebja masterom, **rabotal**, a ona, **zapustiv**<sup>PAP</sup> v volosy tonkie s ostro ottočennymi nogtjami pal'cy, **perečityvala** napisannoe, a **perečitav**<sup>PAP</sup>, **šila** vot ètu samuju šapočku. Inogd[a] ona **sidela** na kortočkach u nižnich polok ili **stojala** na stule u verchnich i trjapkoj **vytiral** sotni pyl'nych koreškov. Ona **sulila** slavu, ona **podgonjala** ego i vot tut-to **stala** **nazyvat'** masterom. Ona **dožidalas'** ètič obeščannych uže poslednich slov o pjatom prokuratore ludei, naraspev i gromko **povtorjala** otdel'nye frazy, kotorye ej **nravilis'**, i **govorila**, čto v ètom romane ee žizn'.

Z vyprávění vyplynulo, jak milenci společně **trávili** den. Ona se nejdřív **opásala** zástěrou a v úzké předsínce s výlevkou, kterou se ubohý pacient **chlubil**, **zapálila** na stole petrolejový vaříč, **uvařila** **snídaní** a **prostřela** na oválném stole v prvním pokoji. Za májových bouří, kdy se kolem poloslepých oken s rachotem **řtila** pod páh vodní záplava a **hrozila** **zatopit** jejich poslední útulek, milenci **roztápěli** kamna a **pekli** v nich brambory. Z brambor se **kouřilo** a černá slupka **špinila** prsty. Ve sklepě se **ozýval** smích, zatímco keře v zahradě stěpávaly po dešti ulámané větvičky a bílé hrozny.

Když **skončilo** období bouřek a **vypuklo** horké léto, **objevily** se ve váze dlouho očekávané a oběma milé růže. Ten, co si říkal Mistr, horečně **psal** svůj román, který plně upoutal i neznámou.

„Važně, občas jsem na ni kvůli tomu žárlil!“ svěřoval Ivanovi noční host z měsíčního balkónu.

**Zaryla** si do vlasů štíhlé pěstěné nehty, **donekonečna pročítala**, co **napsal**, a **pak šila** zmíněnou čepičku. **Občas sedávala**<sup>ifreq</sup> na bobku u dolních poliček s knihami nebo **stála** na židli u horních a hadrem **utírala** stovky zaprášených hřbetů. **Předpovídala** autorovi slávu, **honila** ho do práce a tehdy mu **začala** **říkat** Mistr. Netrpělivě **čekala** na slíbená poslední slova o pátém prokurátorovi Judeje, zpěvavě nahlas **opakovala** jednotlivě věty, které se jí **zalíbily**, a **tvrdila**, že tím románem žije. (MM 136 / 113f.)

- Byl** očen' **vspyl'čiv**<sup>Adj</sup>, no **otchodiv**<sup>(pPart)Adj</sup> [...]

Rychle **vzplanul**, ale **stejně rychle** se **uklidnil** [...] (RJ 386 / 6)

## Sources

- Bulgakov, Michail: Master i Margarita. In: Bulgakov, Michail: Master i Margarita. Rokovye jajca. Sobač'e serdce: Roman, povesti. Irkutsk 1988, 3-382. / Mistr a Markétka. Praha 1990.
- Bulgakov, Michail: Rokovye jajca. In: Bulgakov, Michail: Master i Margarita. Rokovye jajca. Sobač'e serdce: Roman, povesti. Irkutsk 1988, 383-456. / Osudná vejce. Praha 2000.
- Dovlatov, Sergej: Zona. Zapiski nadziratelja. In: Dovlatov, Sergej: Sobranie prozy v trech tomach. Sankt Peterburg 1993, Band I, 25-172. / Lágr. Praha 1998.
- Hrabal, Bohumil: Jetel růžák. In: Ders.: Sebrané spisy 10. Praha 1994, 106-112. / Grabal, Bogumil: Rozvoj klevr. In: Biblioteka Moškova (Internet): Inostrannaja literatura 4 (2001).
- Hrabal, Bohumil: Mořská panna. In: Ders.: Sebrané spisy 10. Praha 1994, 9-17. / Grabal, Bogumil: Rusalka. In: Biblioteka Moškova (Internet): Inostrannaja literatura 4 (2001).
- Hrabal, Bohumil: Rukověť Pábitelského učně. In: Hrabal, Bohumil: Sebrané spisy 8. Praha 1993, 179-182. / Grabal, Bogumil: Rukovodstvo Il'ja učenika Pabitelja. In: Biblioteka Moškova (Internet): Inostrannaja literatura 4 (2001).
- Hrabal, Bohumil: Sextánka. In: Hrabal, Bohumil: Sebrané spisy 10. Praha 1994, 145-153. / Grabal, Bogumil: Šestiklassnica. In: Biblioteka Moškova (Internet): Inostrannaja literatura 4 (2001).
- Kundera, Milan: Žert. Praha 1967. / Šutka. Sankt-Peterburg 1999.

## References

- Petrushina, Elena V. (2000): *Aspektual'nye kategorii glagola v russkom jazyke v sopostavlenii s češským, slovenským, pol'ským i bolgarským jazykami*. Moskva: Izdatel'stvo Moskovskogo Universiteta.
- Stunová, Anna (1988): Aspect and sequence of events in Russian and Czech: A contrastive study. In: Barentsen, Adrian A., Ben M. Groen & Rob Sprenger (eds): *Dutch Contributions to the Tenth International Congress of Slavists, Sofia 1988, Linguistics*. Amsterdam: Brill. (= Studies in Slavic and General Linguistics 11), 507-534.
- Stunová, Anna (1993): *A Contrastive Analysis of Russian and Czech Aspect. Invariance vs. Discourse*. Ph.D. Thesis, University of Amsterdam.
